# Supplementary material for: Reprogrammed lipid metabolism protects inner nuclear membrane against unsaturated fat
Source: PubMed Central journal article supplement (PMC8480995; doi:10.1016/j.devcel.2021.07.018), 2021-09-27
Supplement: mmc1.pdf [file mmc1.pdf]

**Developmental Cell, Volume 56**

**Supplemental information**

**Reprogrammed lipid metabolism protects inner  
nuclear membrane against unsaturated fat**

**Anete Romanauska and Alwin Köhler**

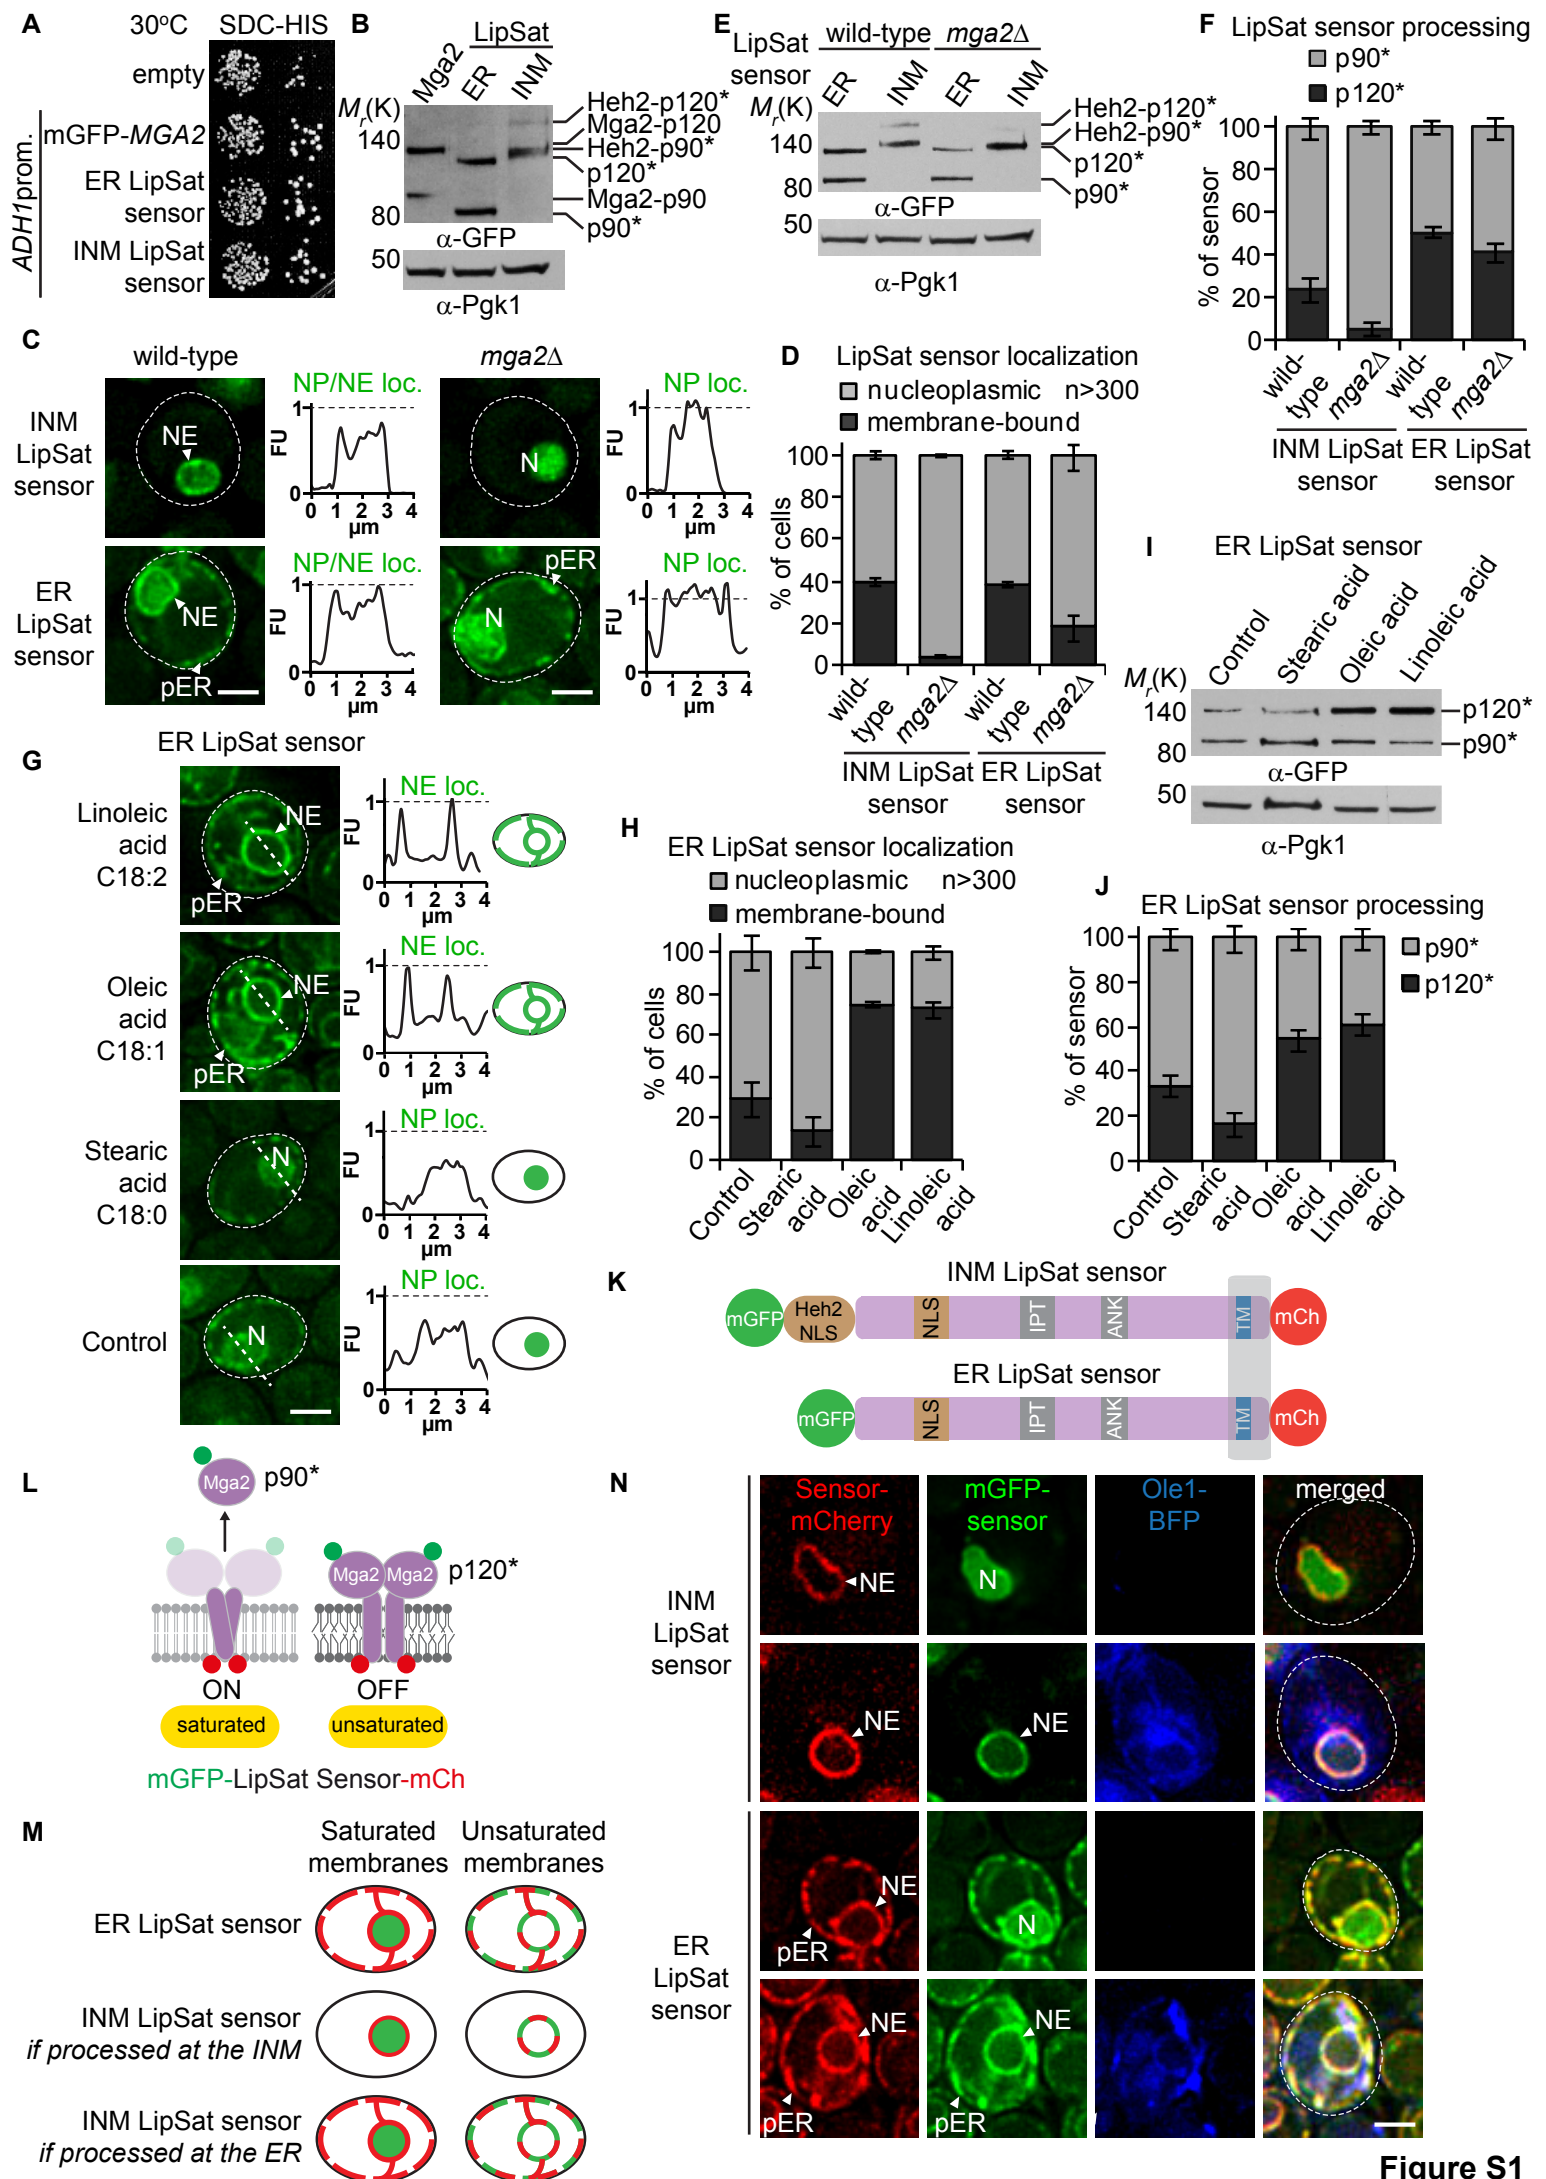

Figure S1

**Supplementary Figure 1. Characterization of LipSat sensor activity in response to nutrients and genetic perturbations, Related to Figures 1 and 2.**

**(A)** Lipid Saturation (LipSat) sensors, expressed in *mga2Δ* cells, do not impair cell growth. Phenotypic analysis of plasmid-based full-length *MGA2* (wild-type control) and the indicated Lipid Saturation (LipSat) sensors. Growth was followed on SDC-HIS plates. Cells were spotted onto plates in 10-fold serial dilutions and incubated at 30°C.

**(B)** Protein levels of wild-type Mga2 (expressed from endogenous *MGA2* promoter) compared to the ER and INM LipSat sensors, both expressed from the *ADH1* promoter. Pgk1 serves as a loading control.

**(C)** Comparison of wild-type and *mga2Δ* cells expressing the indicated LipSat sensors. Sensor fluorescence intensity was quantified across a line spanning the nucleus. For comparison the FU value 1 is marked with a horizontal dashed line. LipSat sensor expression in wild-type cells might lead to some heterodimerization with endogenous Mga2, which is excluded in the *mga2Δ* background. Arbitrary Fluorescence Units, FU; nucleus, N; peripheral endoplasmic reticulum, pER; nuclear envelope, NE; nucleoplasmic localization, NP loc.; nuclear envelope localization, NE loc. Scale bar, 2 μm.

**(D)** Quantification of LipSat sensor localization in **(C)**. Phenotypes were classified as membrane-bound or nucleoplasmic. Mean value and standard deviation are depicted. n = number of analyzed cells for each condition from 3 biological replicates.

**(E)** Immunoblotting analysis of LipSat sensor processing. Samples were taken from cell cultures used in **(C)**. GFP-tagged Heh2-p120\*/p90\* fragments have a higher molecular weight than p120/p90. Pgk1 serves as a loading control.

**(F)** Quantification of LipSat sensor processing in **(E)**. The percentage of Heh2-p120\* and Heh2-p90\* or p120\* and p90\* relative to total amount of sensor was quantified. The mean value and standard deviation from 3 biological replicates are depicted. **(G)**

Live imaging of *mga2Δ* cells expressing the plasmid-based ER LipSat sensor supplemented with the indicated fatty acids (16 mM). Sensor fluorescence intensity was quantified across a line spanning the nucleus. For comparison the FU value 1 is marked with a horizontal dashed line. Dashed white line indicates the cell contour. Arbitrary Fluorescence Units, FU; nucleus, N; peripheral endoplasmic reticulum, pER; nuclear envelope, NE; nucleoplasmic localization, NP loc.; nuclear envelope localization, NE loc. Scale bar, 2 μm.

**(H)** Quantification of ER LipSat sensor localization in **(G)**. Phenotypes were classified as: membrane-bound or nucleoplasmic. Mean value and standard deviation are depicted. n = number of analyzed cells for each condition from 3 biological replicates.

**(I)** Immunoblotting analysis of ER LipSat sensor processing in **(G)**. Pgk1 serves as a loading control.

**(J)** Quantification of ER LipSat sensor processing in **(I)**. The percentage of p120\* and p90\* relative to total amount of sensor was quantified. The mean value and standard deviation from 3 biological replicates are depicted.

**(K)** Cartoon of ER LipSat sensor and INM LipSat sensor carrying an N-terminal mGFP tag and a C-terminal mCherry tag.

**(L)** Probing the compartment of LipSat processing. When saturated lipids increase (ON), the mGFP-tagged portion of the sensor is processed, released from the membrane and driven into the nucleus by its cryptic NLS. In contrast, the mCherry-tagged transmembrane (TM) part remains in the same membrane location. In the OFF state (unsaturated lipids), the sensor is not processed and the mGFP and mCherry signals co-localize.

**(M)** Cartoon of possible LipSat sensor processing sites in the cell. If the INM sensor was processed at the INM, the mCherry-tagged TM fragment should always localize to the INM. If INM sensor processing occurred in the ER, the mCherry-tagged TM fragment should remain in the ER.

**(N)** Live imaging of LipSat sensors carrying an N-terminal mGFP and a C-terminal mCherry tag in *mga2Δ* cells. Ole1-BFP was overexpressed to increase UFA levels. Note that mCherry and mGFP fluorescence of the INM LipSat sensor co-localize at the INM consistent with UFA sensing and processing inside the nucleus. Processing of the LipSat sensor occurs on the N-terminal, nucleoplasmic side of the transmembrane helix (TM). The mCherry tag, however, is located on the C-terminal side of the TM in the perinuclear space. Hence, after processing, the mGFP part is released into the nucleoplasm, whereas the mCherry remains attached to the INM-bound TM. Nucleus, N; peripheral endoplasmic reticulum, pER; nuclear envelope, NE. Scale bar, 2 μm.

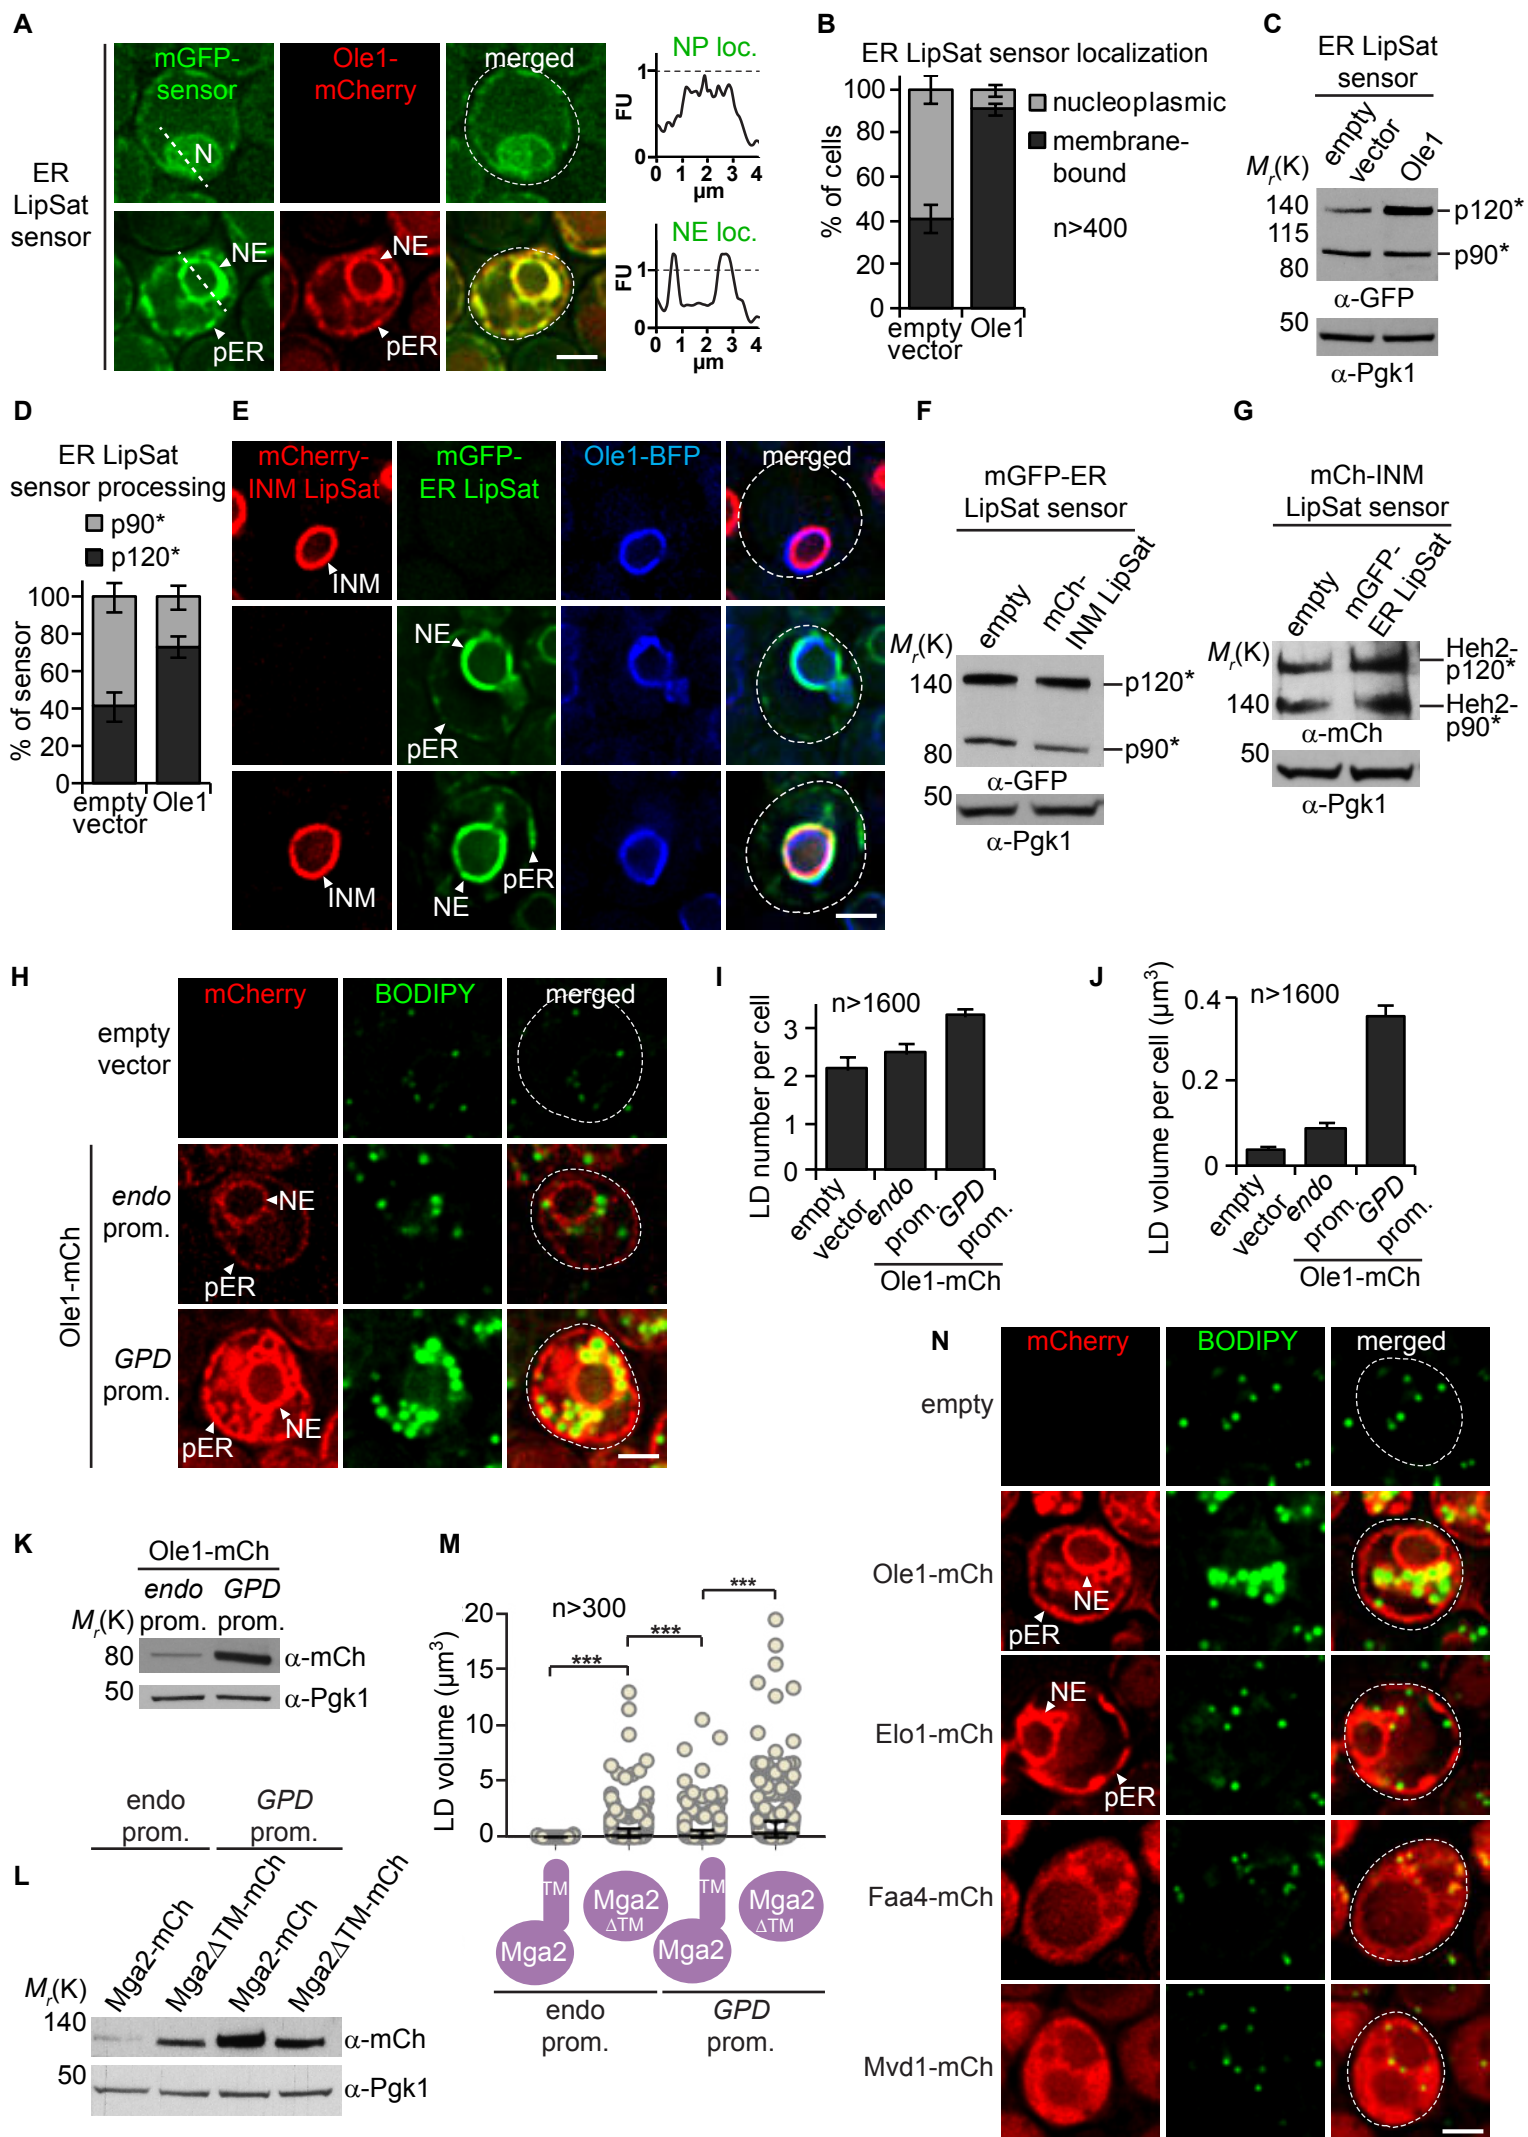

Figure S2

**Supplementary Figure 2. Ole1 regulates lipid droplet formation, Related to Figures 2 and 3.**

**(A)** Live imaging of cells expressing the ER LipSat sensor together with Ole1-mCherry (bottom panel) or an empty vector (top panel). Ole1-mCherry was expressed from the strong *GPD (TDH3)* promoter. Plasmids were transformed into *mga2Δ* cells. Sensor fluorescence intensity was quantified across a line spanning the nucleus. For comparison the FU value 1 is marked with a horizontal dashed line. Arbitrary Fluorescence Units, FU; nucleus, N; peripheral endoplasmic reticulum, pER; nuclear envelope, NE; nucleoplasmic localization, NP loc; nuclear envelope localization, NE loc. Scale bar, 2  $\mu\text{m}$ .

**(B)** Quantification of ER LipSat sensor localization in **(A)**. Phenotypes were classified as membrane-bound or nucleoplasmic. Mean value and standard deviation depicted. n = number of analyzed cells for each condition from 3 biological replicates.

**(C)** Immunoblotting analysis of ER LipSat sensor processing in **(A)**. Pgk1 serves as a loading control.

**(D)** Quantification of ER LipSat sensor processing in **(C)**. The percentage of p120\* and p90\* relative to total amount of sensor was quantified. The mean value and standard deviation from 3 biological replicates are depicted.

**(E)** Live imaging of *mga2Δ* cells expressing the INM LipSat sensor alone, or the ER LipSat alone or both LipSat sensors together. Genomically integrated Ole1-BFP was expressed from the strong *GPD (TDH3)* promoter. Peripheral endoplasmic reticulum, pER; nuclear envelope, NE; inner nuclear membrane, INM. Scale bar, 2  $\mu\text{m}$ .

**(F)** Immunoblotting analysis of ER LipSat sensor processing in **(E)**. Pgk1 serves as a loading control.

**(G)** Immunoblotting analysis of INM LipSat sensor processing in **(E)**. Note that the mCh-tagged Heh2-p120\*/p90\* fragments have a higher molecular weight than p120/p90. Pgk1 serves as a loading control.

**(H)** Live imaging of cells expressing Ole1-mCherry on top of the wild-type allele. Ole1 was expressed from its endogenous or a strong *GPD* promoter. LDs are stained with BODIPY. Peripheral ER, pER; nuclear envelope, NE. Scale bar, 2  $\mu\text{m}$ .

**(I)** Quantification of total LD number per cell in **(H)**. n = number of analyzed cells for each condition from 3 biological replicates. Mean value and standard deviation are indicated.

**(J)** Quantification of total LD volume per cell in **(H)** n = number of analyzed cells for each condition from 3 biological replicates. Mean value and standard deviation are indicated.

**(K)** Immunoblotting analysis of Ole1-mCherry expression levels in **(H)**. Pgk1 serves as a loading control.

**(L)** Immunoblotting analysis of Mga2-mCherry expression levels in **Figure 3A**. Pgk1 was used as a loading control.

**(M)** Automated quantification of total LD volume in **Figure 3A**. n = number of analyzed cells from 3 biological replicates. p-value (\*\*<math><math>0.001</math></math>) was determined by Mann-Whitney test. Mean value and standard deviation are indicated.

**(N)** Live imaging of wild-type cells expressing the indicated plasmid-based constructs from the strong *GPD* promoter. LDs are stained with BODIPY. Peripheral endoplasmic reticulum, pER; nuclear envelope, NE. Scale bar, 2  $\mu$ m.



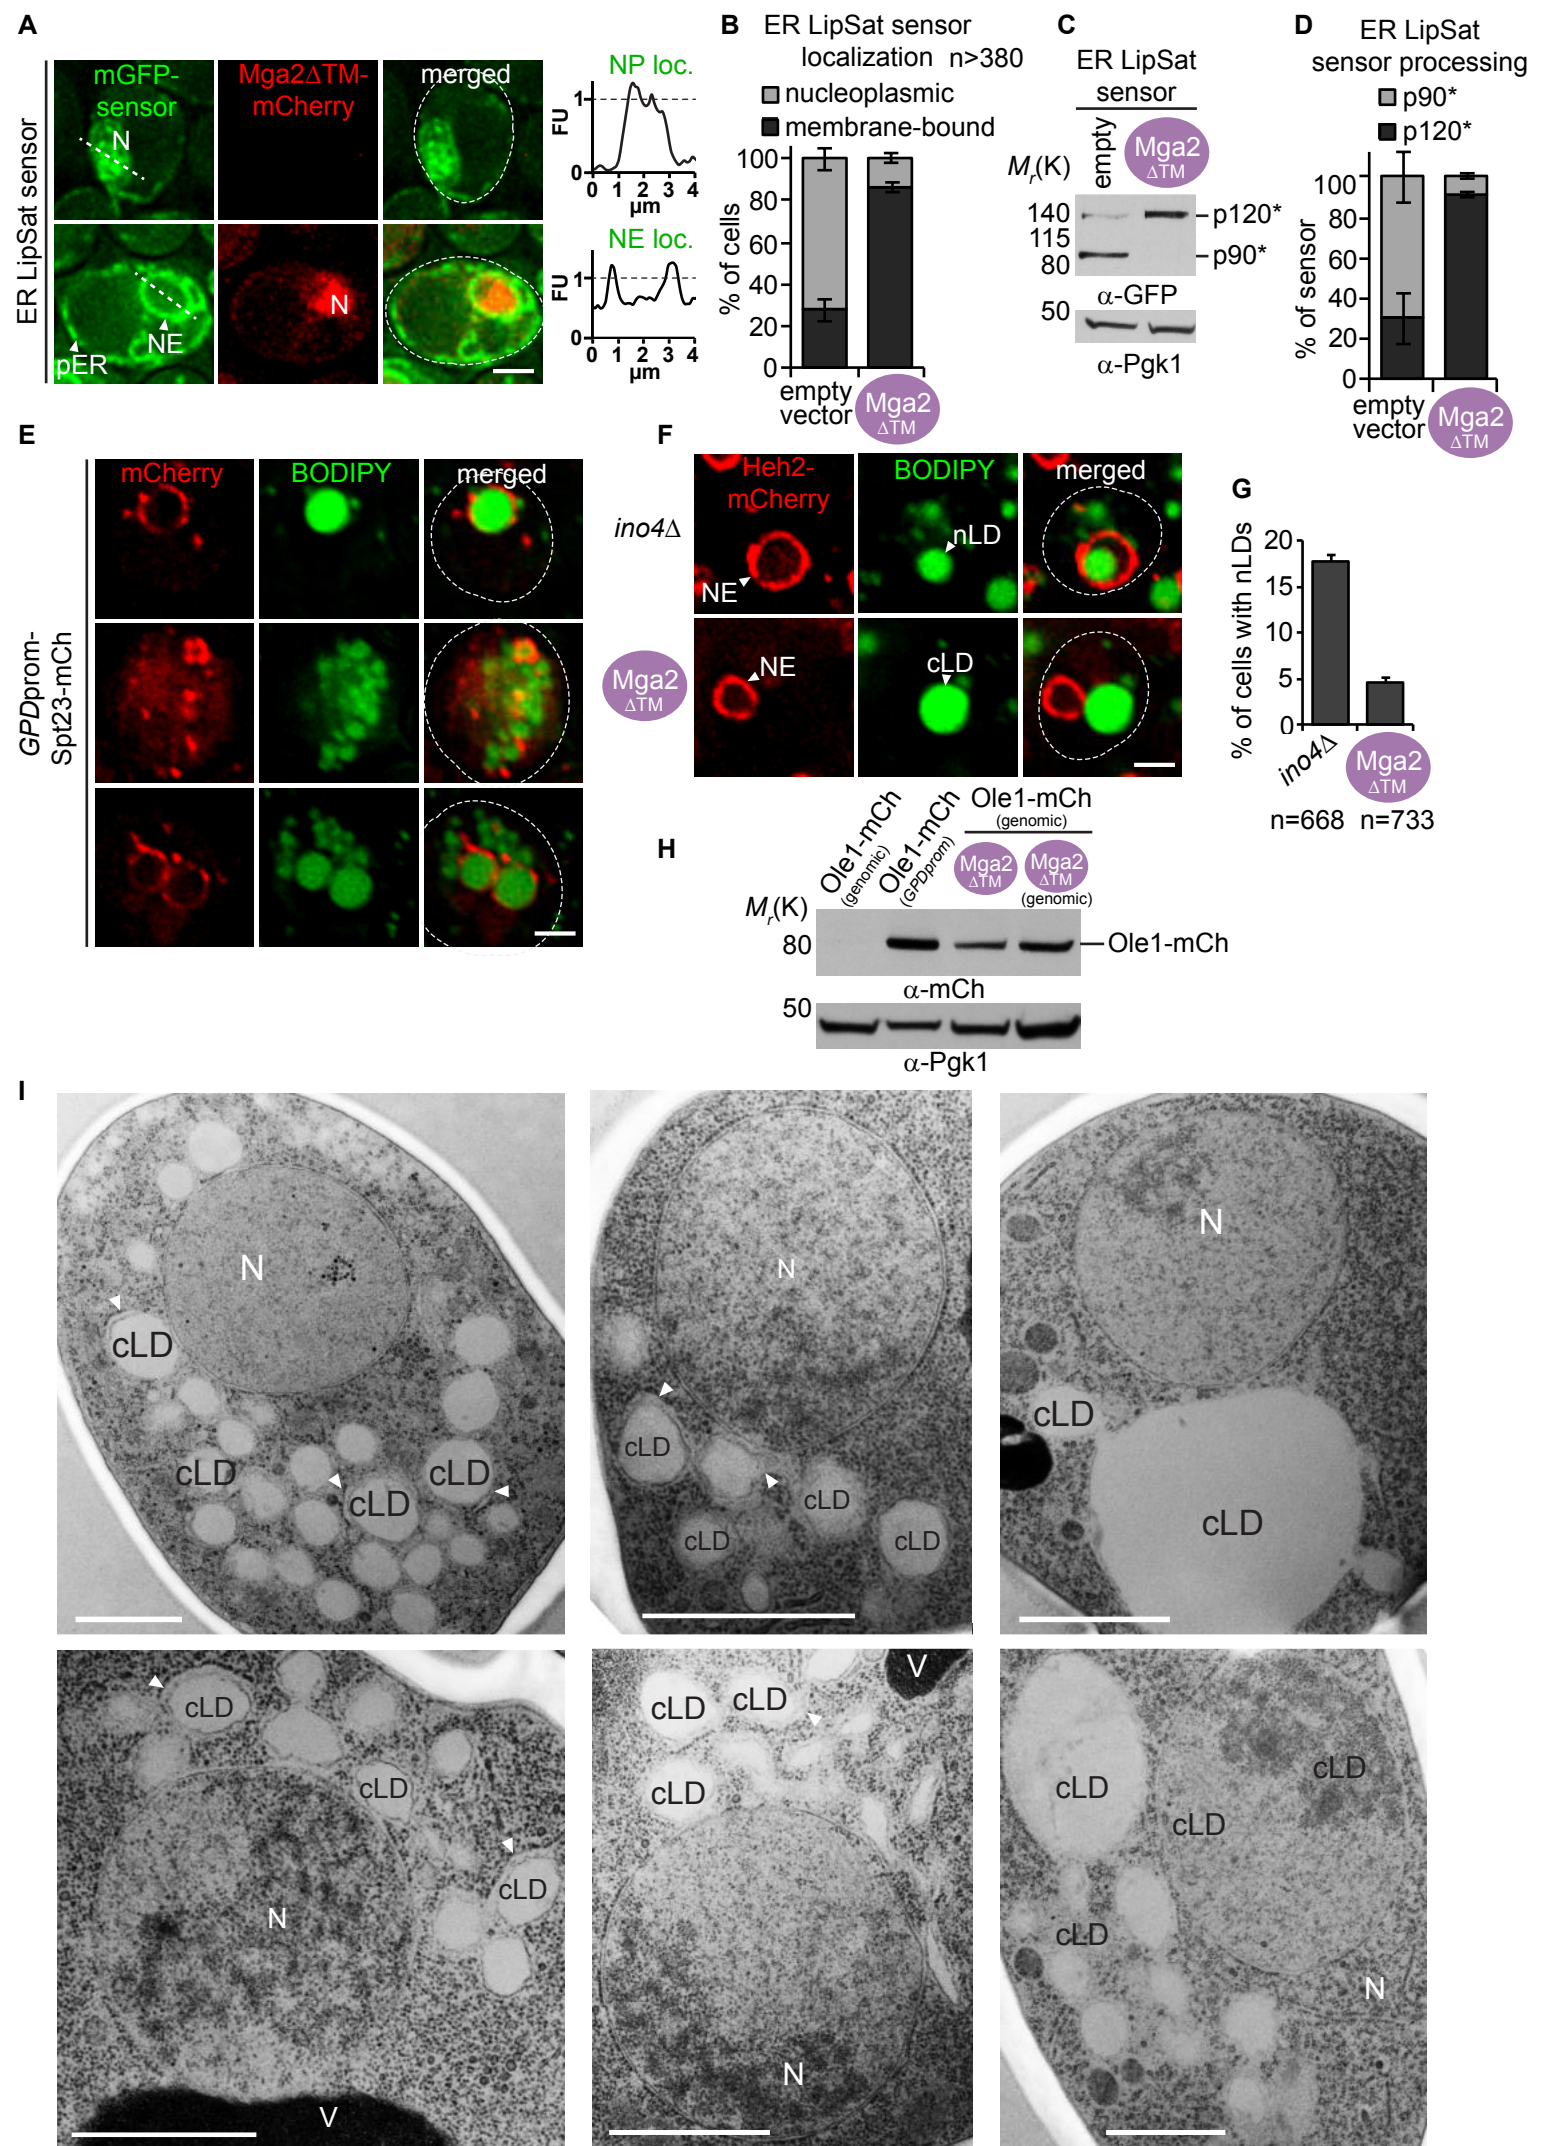

Figure S3



**Supplementary Figure 3. Mga2 activity increases cytoplasmic LD formation, Related to Figure 3.**

**(A)** Live imaging of the ER LipSat sensor co-expressed with Mga2 $\Delta$ TM-mCherry or an empty vector. Genomically integrated Mga2 $\Delta$ TM-mCherry was expressed from the strong *GPD* promoter in *mga2 $\Delta$*  cells. Sensor fluorescence intensity was quantified across a line spanning the nucleus. For comparison the FU value 1 is marked with a horizontal dashed line. Arbitrary Fluorescence Units, FU; nucleus, N; peripheral endoplasmic reticulum, pER; nuclear envelope, NE; nucleoplasmic localization, NP loc; nuclear envelope localization, NE loc. Scale bar, 2  $\mu$ m.

**(B)** Quantification of ER LipSat sensor localization in **(A)**. Phenotypes were classified as membrane-bound or nucleoplasmic. Mean value and standard deviation are depicted. n = number of analyzed cells for each condition from 3 biological replicates.

**(C)** Immunoblotting analysis of ER LipSat sensor processing in **(A)**. Pgk1 serves as a loading control.

**(D)** Quantification of ER LipSat sensor processing in **(C)**. The percentage of p120\* and p90\* relative to total amount of sensor was quantified. The mean value and standard deviation from 3 biological replicates are depicted.

**(E)** Overexpression of Spt23 induces LDs. Live imaging of wild-type cells expressing plasmid-based Spt23 from the strong *GPD* promoter. LDs are stained with BODIPY. Scale bar, 2  $\mu$ m.

**(F)** Comparison of nLD content in *ino4 $\Delta$*  or Mga2 $\Delta$ TM overexpressing cells. Heh2-mCherry was used as an INM marker. LDs are stained with BODIPY. Cytoplasmic lipid droplet, cLD; nuclear lipid droplet, nLD; nuclear envelope, NE. Scale bar, 2  $\mu$ m.

**(G)** nLD quantification in **(F)**. nLDs were defined as BODIPY-positive structures within the Heh2-labeled INM. More than 660 cells were counted for each condition from 3 biological replicates. The mean value and standard deviation are depicted.

**(H)** Expression levels of Ole1 under different experimental conditions. Ole1 was tagged genomically and upregulated via Mga2 $\Delta$ TM overexpression or expressed from a strong *GPD* promoter. LDs in Mga2 $\Delta$ TM-expressing cells are larger/more abundant (compare LD volume per cell in **Figures 3F** and **S2J**) even though Ole1 protein levels were not higher compared to Ole1 overexpressing cells. The likely reason for this effect is that Mga2 affects several target genes as shown in **Figure 4B** (e.g. *MVD1*, *PHS1*, *ICT1* and *ALE1*) which may synergize in buffering excess UFAs via LD biogenesis. Pgk1 serves as a loading control.

**(I)** TEM analysis of Mga2 $\Delta$ TM overexpressing cells. A plasmid-based Mga2 $\Delta$ TM construct was expressed from the *GPD* promoter in *mga2 $\Delta$*  cells. ER membranes are

frequently wrapped around cLDs in this mutant (arrowheads). Nucleus, N; vacuole, V; cytoplasmic lipid droplet, cLD. Scale bar, 1  $\mu\text{m}$ .

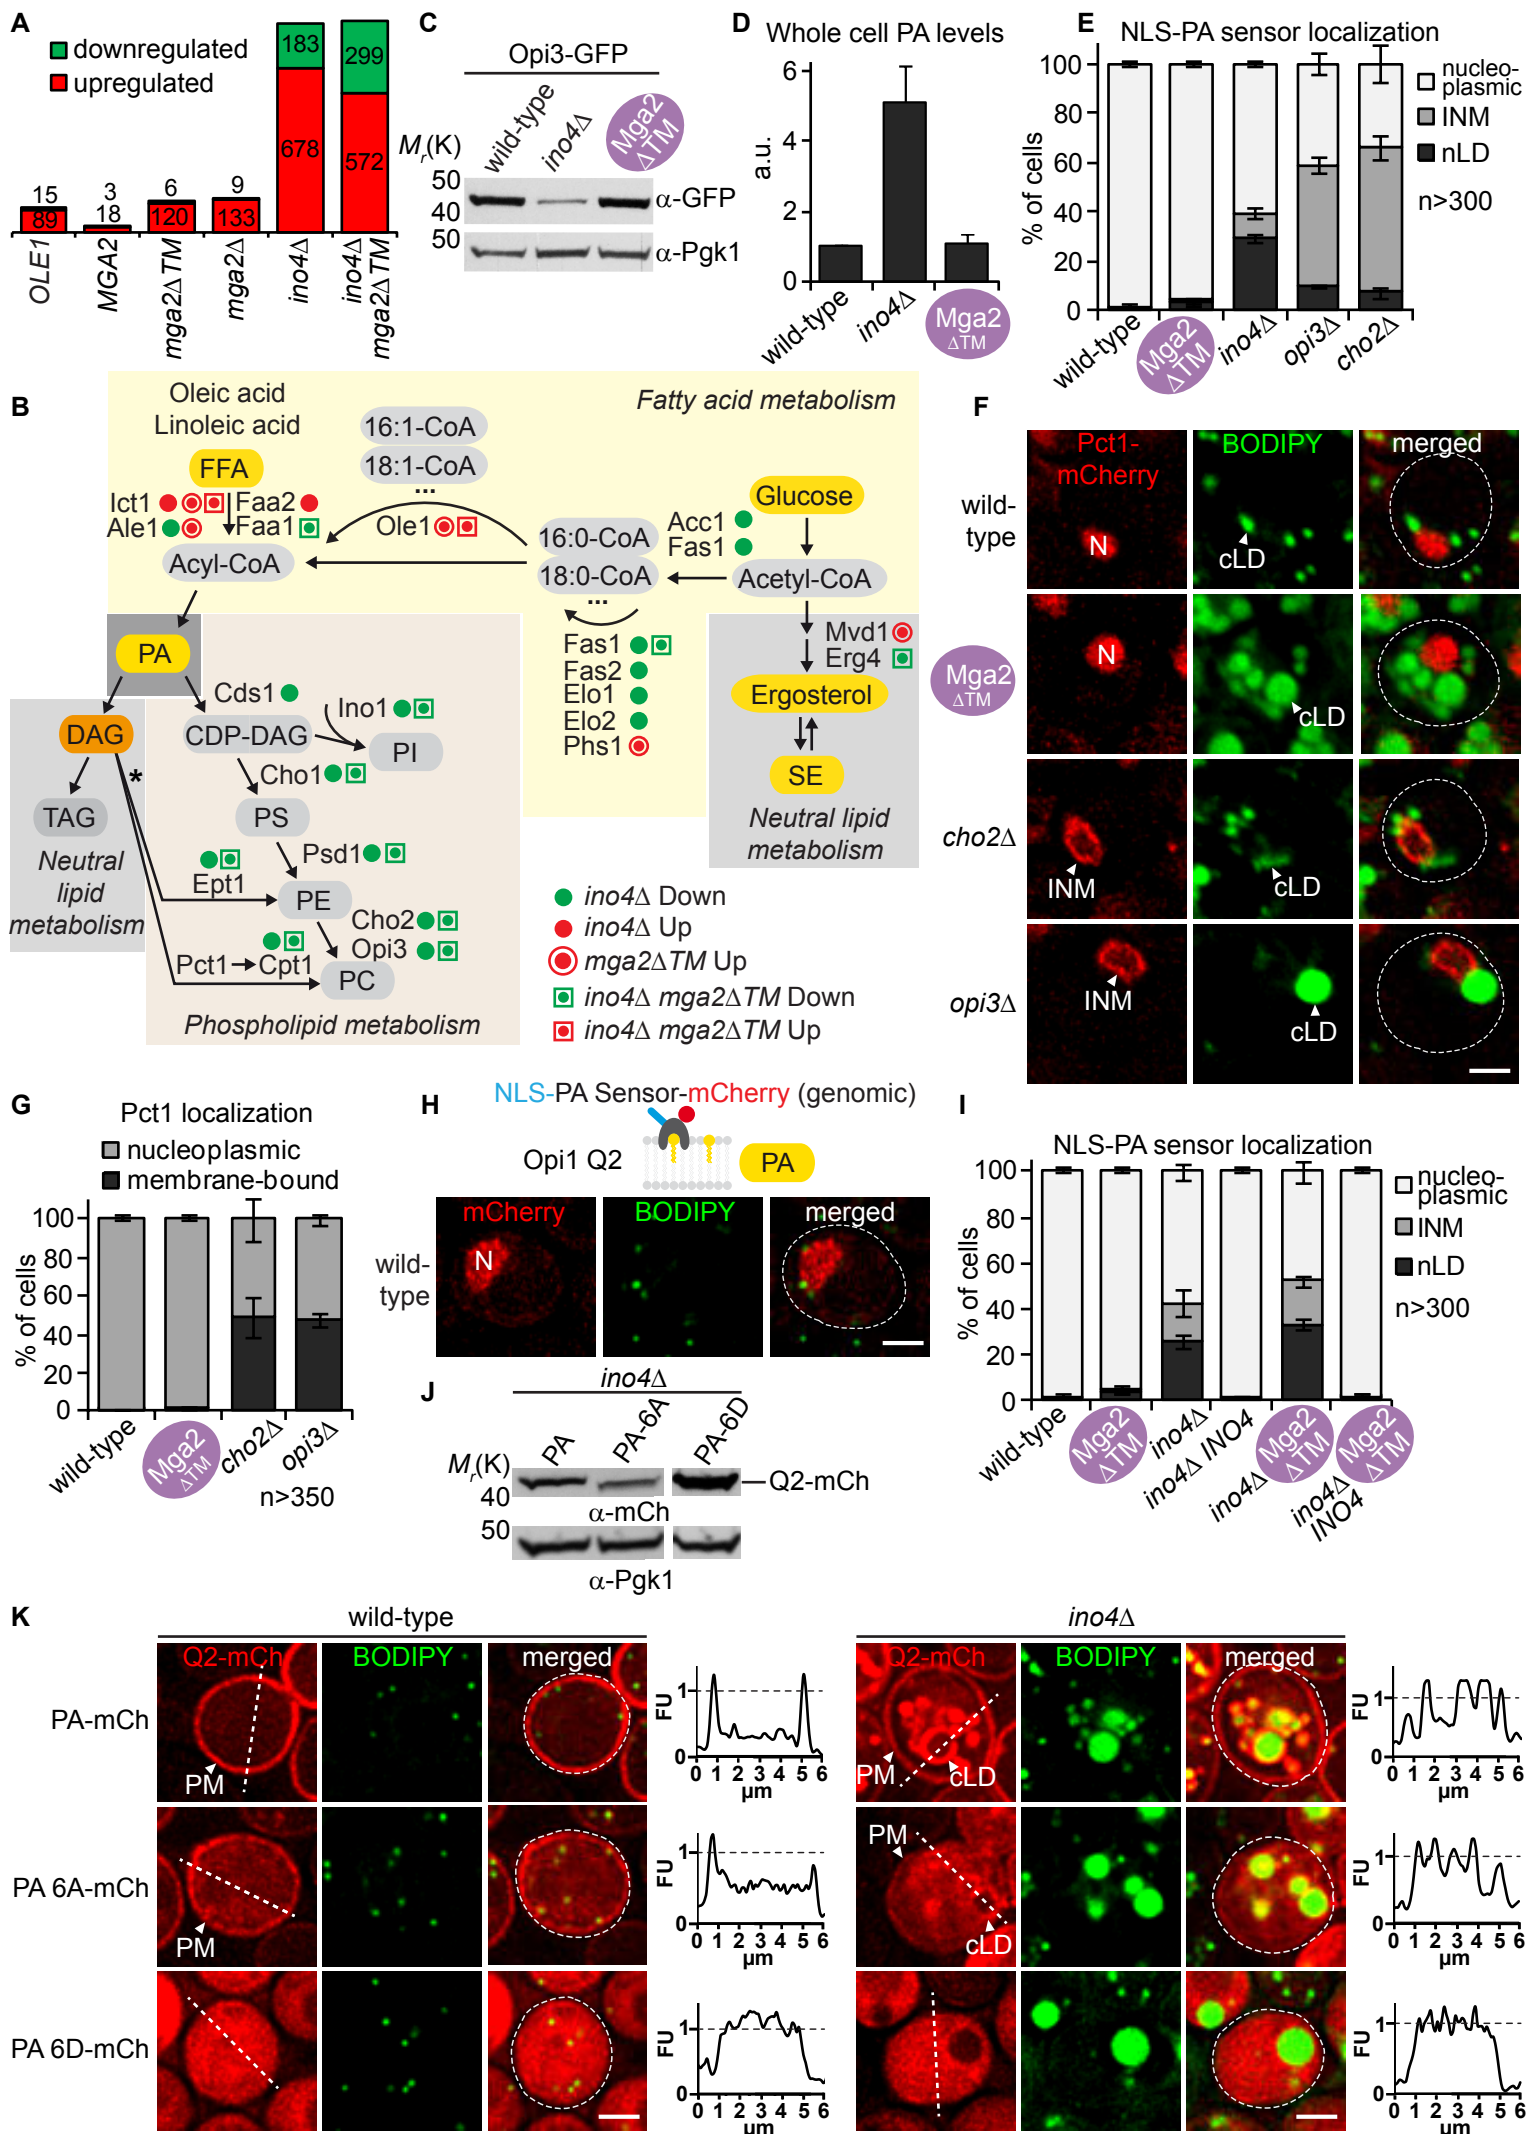

Figure S4

**Supplementary Figure 4. Transcriptome analysis and cellular phosphatidylcholine / phosphatidic acid measurements, Related to Figure 4.**

**(A)** Number of differentially transcribed genes in **Figure 4A**.

**(B)** Simplified scheme of lipid metabolism in yeast. Major pathways are color-coded and key lipid intermediates/end products are depicted. Differentially transcribed enzymes in the mutant strains are shown and marked with a green dot (down), red dot (up). Asterisk indicates the Kennedy pathway, which uses exogenous choline and ethanolamine together with DAG to form PE and PC.

**(C)** Immunoblotting analysis of Opi3-GFP protein levels confirms the transcriptional downregulation of *OPI3* in *ino4Δ* cells but not in *Mga2Δ<sup>TM</sup>* overexpressing cells (see **Figure 4B**). Pgk1 serves as a loading control.

**(D)** Whole cell analysis of phosphatidic acid (PA) levels in the indicated mutants compared to wild-type cells. Mean value and standard deviation for each condition from 3 experiments depicted. Arbitrary unit, a.u.

**(E)** Quantification of NLS-PA-mCherry sensor localization as observed in **Figure 4C**. n = number of analyzed cells from 3 biological replicates.

**(F)** Live imaging of Pct1-mCherry (genomically tagged) in the indicated strains. Cells were grown to stationary phase. Nucleus, N; inner nuclear membrane, INM; cytoplasmic lipid droplet, cLD. Scale bar, 2  $\mu$ m.

**(G)** Quantification of Pct1 localization as observed in **(F)**. Phenotypes were classified as membrane-bound or nucleoplasmic. Mean value and standard deviation are depicted. n = number of analyzed cells for each condition from 3 biological replicates.

**(H)** Live imaging of wild-type cells expressing genomically integrated NLS-PA-mCherry sensor (control for **Figure 4E**). BODIPY stains LDs. Nucleus, N. Scale bar, 2  $\mu$ m.

**(I)** Quantification of NLS-PA sensor localization in **Figure 4E**. n = number of analyzed cells from 3 biological replicates.

**(J)** Immunoblotting analysis of wild-type and mutant PA sensor expression levels (tagged with mCherry). Pgk1 serves as a loading control. See further explanations in **(K)**.

**(K)** PA sensing by the Opi1-derived PA sensor depends on specific residues within a critical amphipathic helix (AH). This AH harbors two PA-selective three-finger grips, each formed by three basic residues on one side of the helix. The first motif is a KRK motif and the second a 3K motif (Hofbauer et al., 2018). Opi1 harbors additional residues that contribute to PA recognition and these are also present in the sensor (Loewen et al., 2004; Romanauska and Kohler, 2018), but were not examined here.

We created mutations in the AH motifs to test whether sensor binding to PA-rich membranes in general, and binding to PA-rich LDs in particular would be affected. To this end the KRK and 3K motifs in our sensor (i.e. the Q2 domain of Opi1) were substituted by alanines (KRK & 3K > 6A; K112, R115, K119, K121, K125, K128). This variant forms a predicted AH and its mean helical hydrophobic moment ( $\mu_H=0.289$ ) is similar to wild-type ( $\mu_H=0.357$ ). This mutant sensor had a decreased affinity for PA-rich membranes in cells: labeling of PA-rich LDs as well as the PA-rich plasma membrane was reduced when tested in wild-type and *ino4 $\Delta$*  cells. The residual binding to PA-rich membranes is explained by the contribution of residues outside of the AH. Mutating these on top of AH residues (Romanauska and Kohler, 2018) or a charge inversion of R/K residues to aspartate (6D mutant) ( $\mu_H=0.344$ ) further reduces membrane binding. Representative images of PA sensor mutants expressed in wild-type or *ino4 $\Delta$*  cells. BODIPY stains LDs. For comparison the FU value 1 is marked with a horizontal dashed line. Arbitrary Fluorescence Units, FU; plasma membrane, PM; cytoplasmic lipid droplet, cLD. Scale bar, 2  $\mu\text{m}$ .



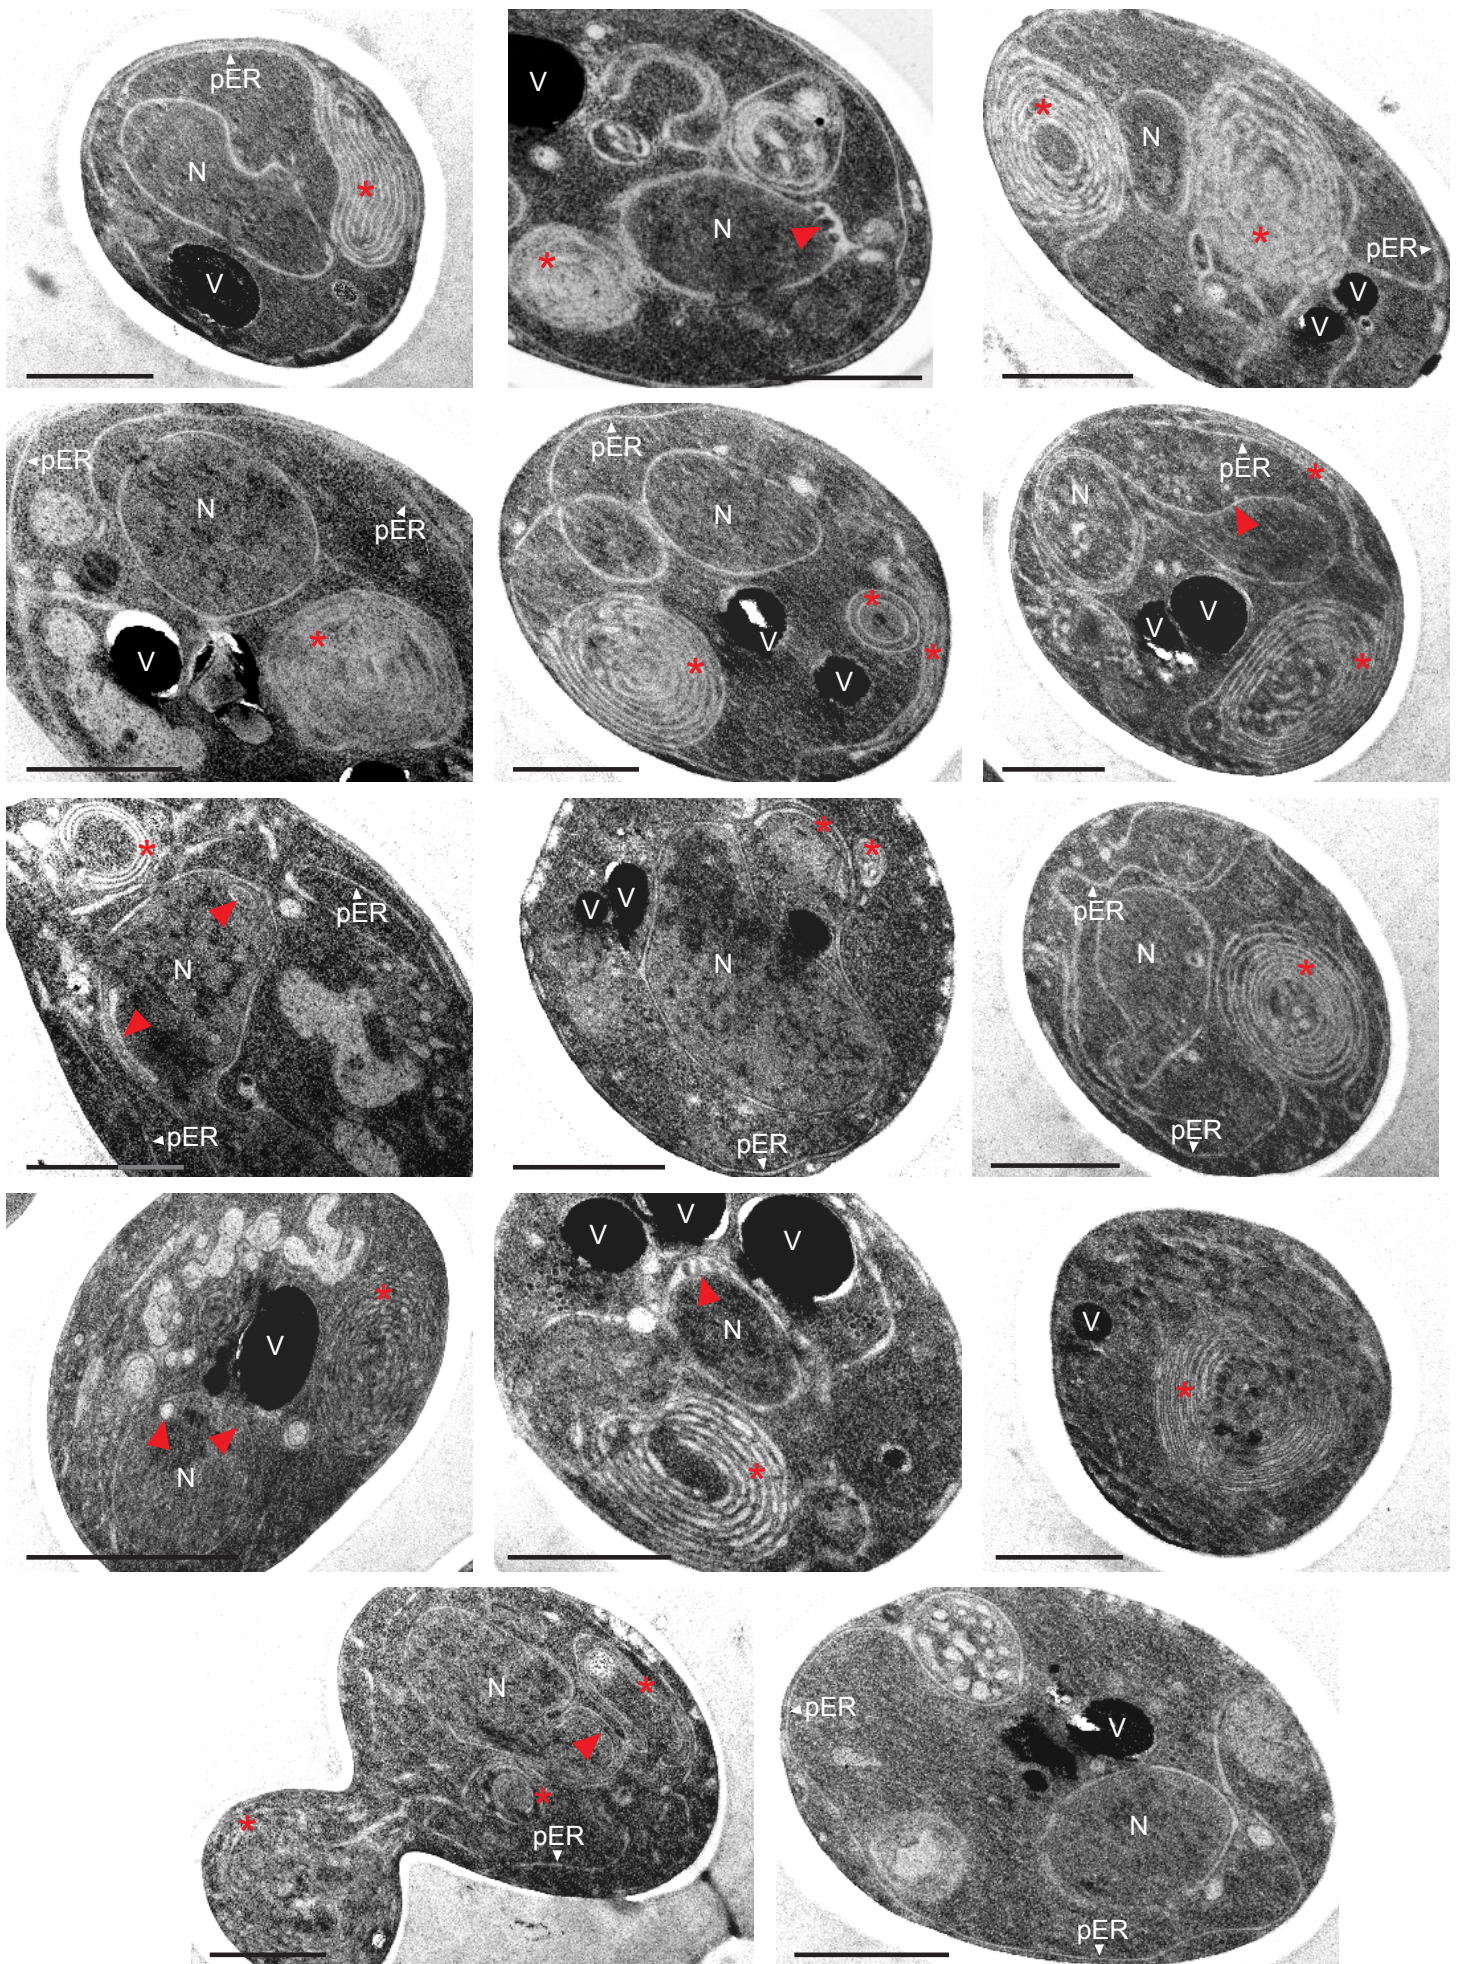

Figure S5

**Supplementary Figure 5. High UFA levels cause ER and NE morphology defects in LD-deficient cells, Related to Figure 5.**

TEM analysis of representative examples of  $4\Delta$  cells overexpressing Mga2 $\Delta$ TM from the inducible *GAL1* promoter. Nucleus, N; vacuole, V; peripheral endoplasmic reticulum, pER. Red asterisk marks membrane stacks/whorls; red arrowhead indicates NE defects including NE expansions and alterations of the perinuclear space. Scale bar, 1  $\mu$ m.



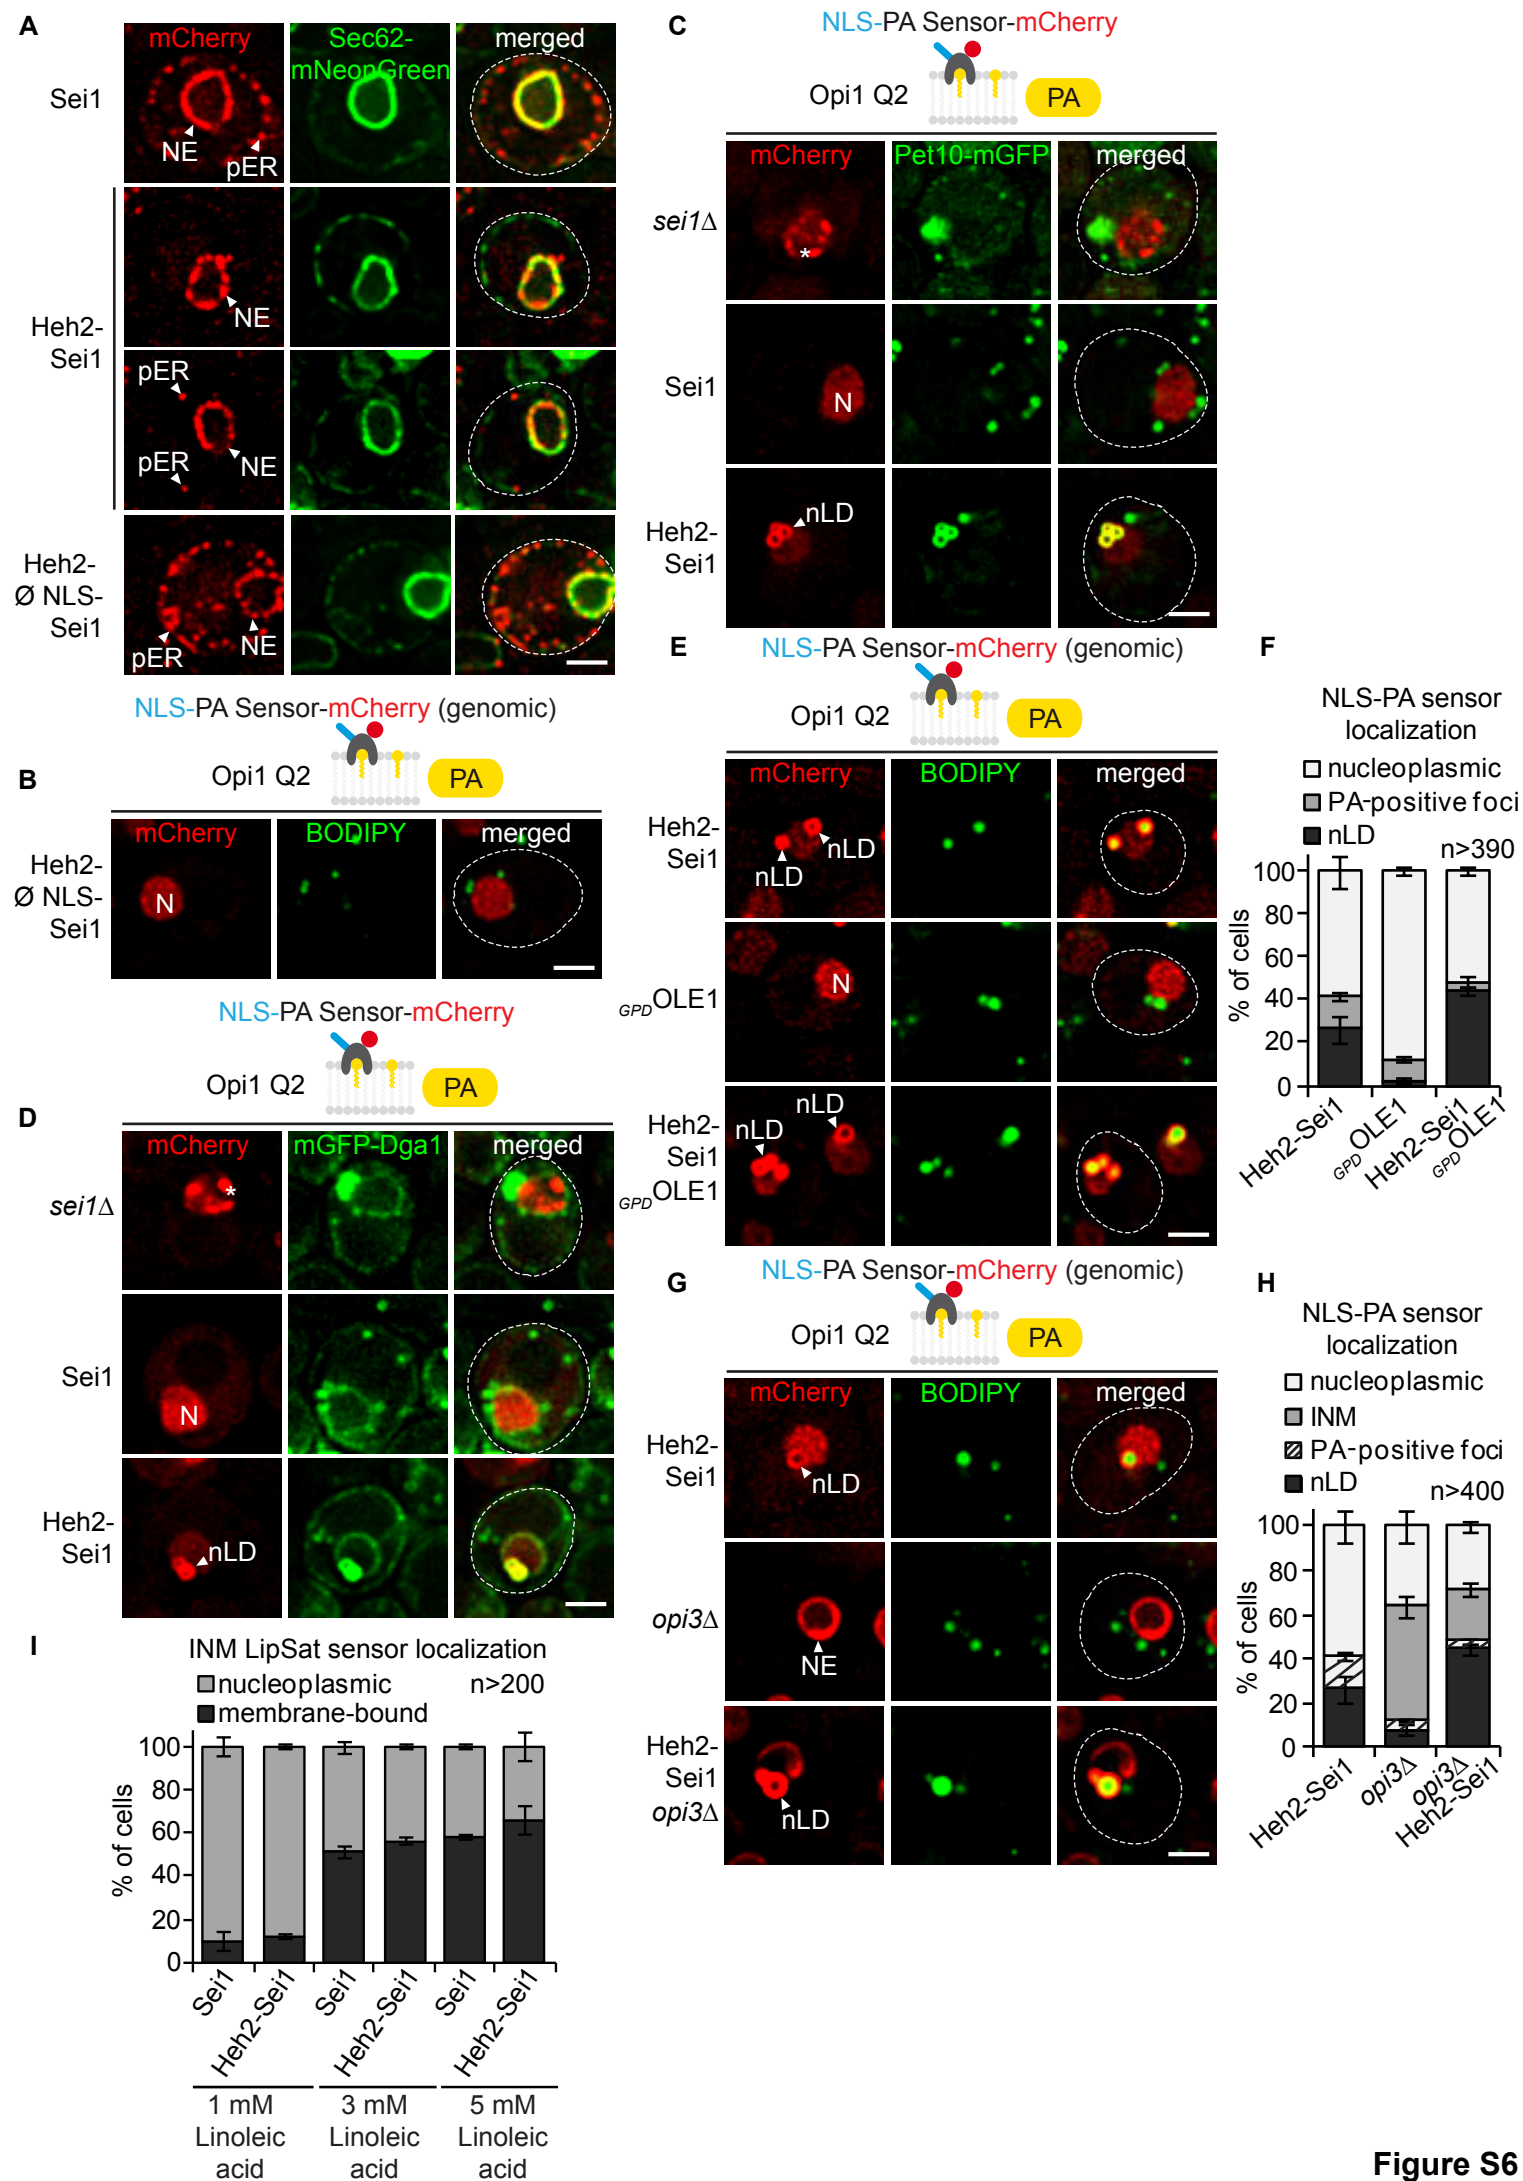

Figure S6

**Supplementary Figure 6. Targeting Sei1 activity to the INM drives nLD production, Related to Figure 6.**

**(A)** Live imaging of *sei1* $\Delta$  cells expressing the indicated *SEI1* constructs from the *SEI1* promoter and Sec62-mNeonGreen as an ER marker. The appended Heh2 fragment comprises an NLS (Heh2 aa93-137) and an adjacent linker (aa 138-317). Heh2- $\emptyset$ NLS-Sei1 indicates a Heh2 fragment with the omitted NLS. Nuclear envelope, NE; peripheral endoplasmic reticulum, pER. Scale bar, 2  $\mu$ m.

**(B)** Live imaging of *sei1* $\Delta$  cells expressing the NLS-PA-mCherry sensor and the plasmid-based Heh2- $\emptyset$ NLS-Sei1 (*SEI1* promoter). Heh2- $\emptyset$ NLS-Sei1 indicates a Heh2 fragment with the omitted NLS. See also **Figure 6A**. BODIPY stains LDs. Nucleus, N. Scale bar, 2  $\mu$ m.

**(C)** Live imaging of cells expressing the perilipin Pet10-mGFP, the NLS-PA-mCherry sensor, and the indicated *SEI1* constructs. *SEI1* constructs were expressed from the endogenous *SEI1* promoter in *sei1* $\Delta$  cells. Nucleus, N; nuclear lipid droplet, nLD. Asterisk marks PA-positive foci. Scale bar, 2  $\mu$ m.

**(D)** Live imaging of cells expressing mGFP-Dga1, NLS-PA-mCherry sensor, and the indicated *SEI1* constructs. *SEI1* constructs were expressed from the endogenous *SEI1* promoter in *sei1* $\Delta$  cells. Nucleus, N; nuclear lipid droplet, nLD. Asterisk marks PA-positive foci. Scale bar, 2  $\mu$ m.

**(E)** Live imaging of NLS-PA-mCherry sensor in the indicated strains as a readout for nLD production. nLDs have a BODIPY-positive core surrounded by a PA-rich shell. Nucleus, N; nuclear lipid droplet, nLD. Scale bar, 2  $\mu$ m.

**(F)** Quantification of NLS-PA sensor localization in **(E)**. n = number of analyzed cells from 3 biological replicates.

**(G)** Live imaging of NLS-PA-mCherry sensor in the indicated strains as a readout for nLD production. nLDs have a BODIPY-positive core surrounded by a PA-rich shell. Nuclear envelope, NE; nuclear lipid droplet, nLD. Scale bar, 2  $\mu$ m.

**(H)** Quantification of NLS-PA sensor localization in **(G)**. n = number of analyzed cells from 3 biological replicates.

**(I)** Quantification of INM LipSat sensor localization in **Figure 6L**. Phenotypes were classified as membrane-bound or nucleoplasmic. Mean value and standard deviation are depicted. n = number of analyzed cells for each condition from 3 biological replicates.



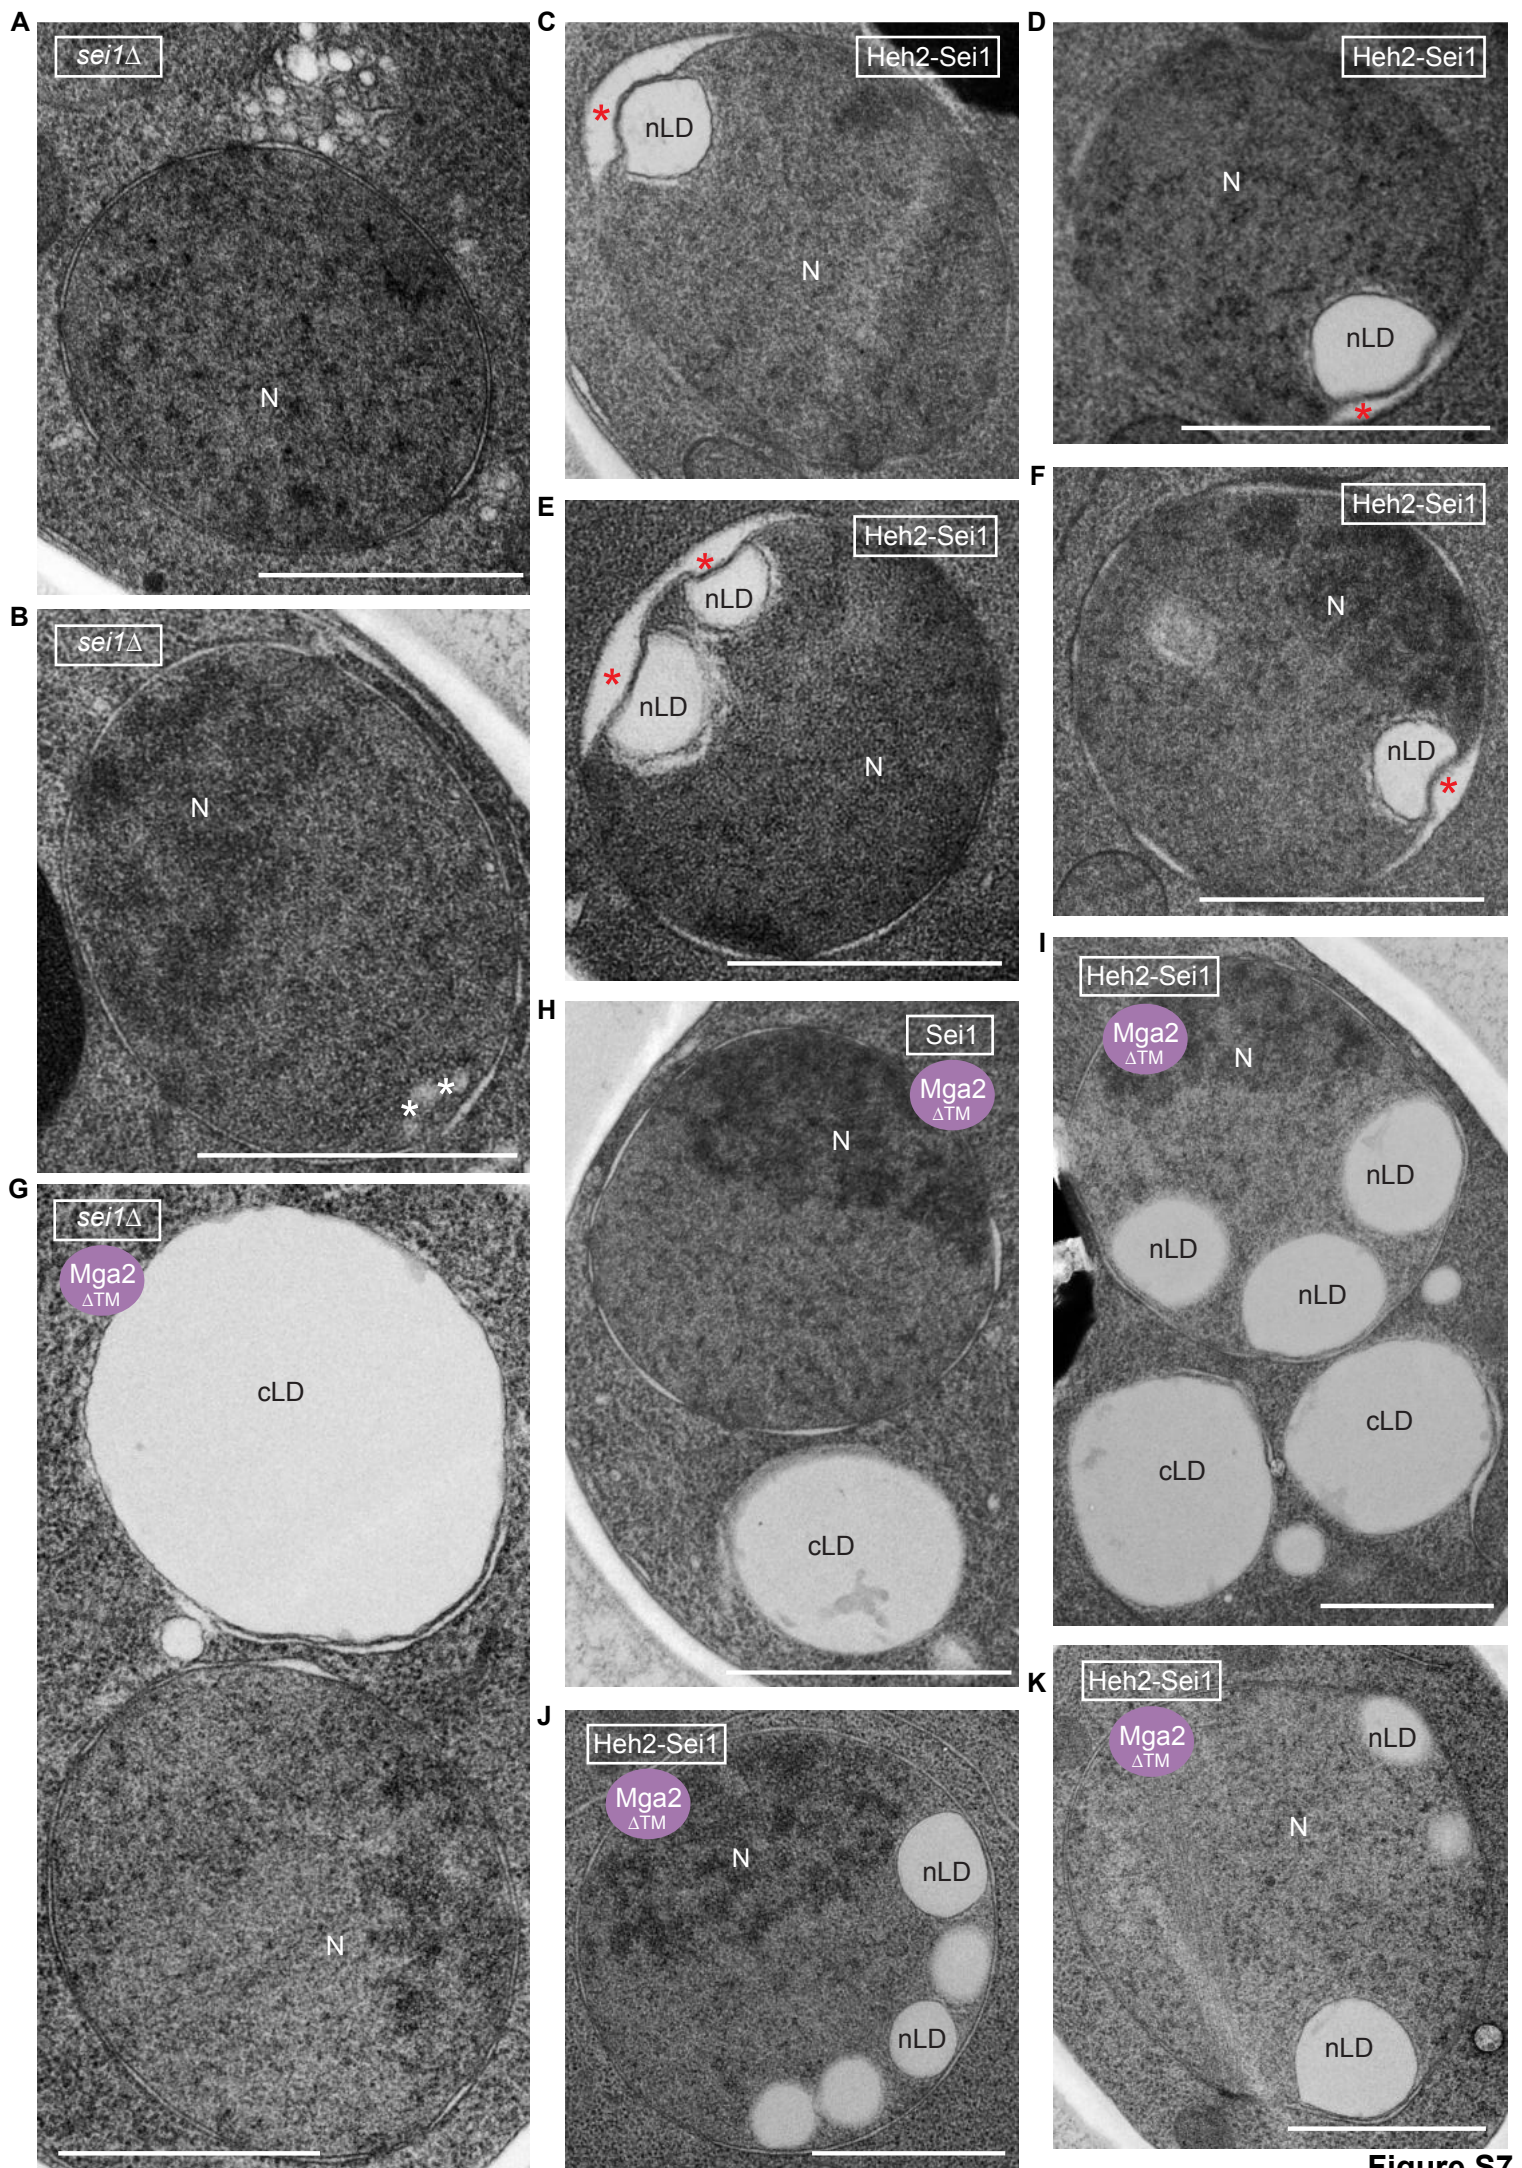

**Figure S7**



**Supplementary Figure 7. Ultrastructural analysis of Sei1-induced nLDs, Related to Figure 6.**

**(A-B)** TEM analysis of representative examples of *sei1* $\Delta$  cells transformed with an empty vector. Nucleus, N. White asterisk indicates some droplet-like structures that might correspond to the small PA-positive foci observed by fluorescence microscopy in **Figure 6A**. Scale bar, 1  $\mu$ m.

**(C-F)** TEM analysis of representative examples of Heh2-Sei1 expressing cells. Plasmid-based Heh2-Sei1 was expressed from the *SEI1* promoter in a *sei1* $\Delta$  strain. Nucleus, N; nuclear lipid droplet, nLD. Red asterisk marks a widened perinuclear space beneath an nLD. Scale bar, 1  $\mu$ m.

**(G)** TEM analysis of a representative example of genomically integrated Mga2 $\Delta$ TM in *sei1* $\Delta$  cells. Mga2 $\Delta$ TM was expressed from the strong *GPD* promoter. Nucleus, N; cytoplasmic lipid droplet, cLD. Scale bar, 1  $\mu$ m.

**(H)** TEM analysis of a representative example of Sei1 expression in genomically integrated Mga2 $\Delta$ TM cells. Mga2 $\Delta$ TM was expressed from the strong *GPD* promoter. Nucleus, N; cytoplasmic lipid droplet, cLD. Scale bar, 1  $\mu$ m.

**(I-K)** TEM analysis of Heh2-Sei1 expression in genomically integrated Mga2 $\Delta$ TM cells. Mga2 $\Delta$ TM was expressed from the strong *GPD* promoter. Nucleus, N; cytoplasmic lipid droplet, cLD; nuclear lipid droplet, nLD. Scale bar, 1  $\mu$ m.

**Table S1. Yeast strains used in this study, related to the Key Resources Table and STAR Methods.**

| YEAST STRAINS                                                                                                                                                                                                                                        | SOURCE     | IDENTIFIER |
|------------------------------------------------------------------------------------------------------------------------------------------------------------------------------------------------------------------------------------------------------|------------|------------|
| <i>S. cerevisiae</i> strain <i>wild-type</i> (BY4741), genotype: <i>MATa</i> ; <i>ura3Δ0</i> ; <i>leu2Δ0</i> ; <i>his3Δ1</i> ; <i>met15Δ0</i>                                                                                                        | Euroscarf  | Y00000     |
| <i>S. cerevisiae</i> strain <i>mga2Δ</i> , genotype: <i>MATa</i> ; <i>ura3Δ0</i> ; <i>leu2Δ0</i> ; <i>his3Δ1</i> ; <i>met15Δ0</i> ; <i>mga2Δ::kanMX4</i>                                                                                             | Euroscarf  | Y05968     |
| <i>S. cerevisiae</i> strain <i>ino4Δ</i> , genotype: <i>MATa</i> ; <i>ura3Δ0</i> ; <i>leu2Δ0</i> ; <i>his3Δ1</i> ; <i>met15Δ0</i> ; <i>ino4Δ::kanMX4</i>                                                                                             | Euroscarf  | Y06258     |
| <i>S. cerevisiae</i> strain <i>mga2Δ</i> Heh2-mCherry Mga2ΔTM, genotype: <i>MATa</i> ; <i>ura3Δ0</i> ; <i>leu2Δ0</i> ; <i>his3Δ1</i> ; <i>met15Δ0</i> ; <i>mga2Δ::kanMX4</i> ; <i>Heh2-mCherry::natNT2</i> ; <i>GPDprom-mga2ΔTM-5xGS-VC::URA3</i>    | This paper | N/A        |
| <i>S. cerevisiae</i> strain <i>mga2Δ</i> Mga2ΔTM-mCherry, genotype: <i>MATa</i> ; <i>ura3Δ0</i> ; <i>leu2Δ0</i> ; <i>his3Δ1</i> ; <i>met15Δ0</i> ; <i>mga2Δ::kanMX4</i> ; <i>GPDprom-mga2ΔTM-mCherry::URA3</i>                                       | This paper | N/A        |
| <i>S. cerevisiae</i> strain <i>mga2Δ</i> Mga2ΔTM, genotype: <i>MATa</i> ; <i>ura3Δ0</i> ; <i>leu2Δ0</i> ; <i>his3Δ1</i> ; <i>met15Δ0</i> ; <i>mga2Δ::kanMX4</i> ; <i>GPDprom-mga2ΔTM-5xGS-VC::URA3</i>                                               | This paper | N/A        |
| <i>S. cerevisiae</i> strain <i>ino4Δ</i> Heh2-mCherry, genotype: <i>MATa</i> ; <i>ura3Δ0</i> ; <i>leu2Δ0</i> ; <i>his3Δ1</i> ; <i>met15Δ0</i> ; <i>ino4Δ::kanMX4</i> ; <i>Heh2-mCherry::natNT2</i>                                                   | This paper | N/A        |
| <i>S. cerevisiae</i> strain NLS-PA-mCh, genotype: <i>MATa</i> ; <i>ura3Δ0</i> ; <i>leu2Δ0</i> ; <i>his3Δ1</i> ; <i>met15Δ0</i> ; <i>ADH1prom-NLS-PA-mCh::HIS3</i>                                                                                    | This paper | N/A        |
| <i>S. cerevisiae</i> strain Mga2ΔTM NLS-PA-mCh, genotype: <i>MATa</i> ; <i>ura3Δ0</i> ; <i>leu2Δ0</i> ; <i>his3Δ1</i> ; <i>met15Δ0</i> ; <i>ADH1prom-NLS-PA-mCh::HIS3</i> ; <i>GPDprom-mga2ΔTM-5xGS-VC::URA3</i>                                     | This paper | N/A        |
| <i>S. cerevisiae</i> strain <i>ino4Δ</i> NLS-PA-mCh, genotype: <i>MATa</i> ; <i>ura3Δ0</i> ; <i>leu2Δ0</i> ; <i>his3Δ1</i> ; <i>met15Δ0</i> ; <i>ino4Δ::natNT2</i> ; <i>ADH1prom-NLS-PA-mCh::HIS3</i>                                                | This paper | N/A        |
| <i>S. cerevisiae</i> strain <i>opi3Δ</i> NLS-PA-mCh, genotype: <i>MATa</i> ; <i>ura3Δ0</i> ; <i>leu2Δ0</i> ; <i>his3Δ1</i> ; <i>met15Δ0</i> ; <i>opi3Δ::natNT2</i> ; <i>ADH1prom-NLS-PA-mCh::HIS3</i>                                                | This paper | N/A        |
| <i>S. cerevisiae</i> strain <i>cho2Δ</i> NLS-PA-mCh, genotype: <i>MATa</i> ; <i>ura3Δ0</i> ; <i>leu2Δ0</i> ; <i>his3Δ1</i> ; <i>met15Δ0</i> ; <i>cho2Δ::natNT2</i> ; <i>ADH1prom-NLS-PA-mCh::HIS3</i>                                                | This paper | N/A        |
| <i>S. cerevisiae</i> strain <i>ino4Δ</i> NLS-PA-mCh Mga2ΔTM, genotype: <i>MATa</i> ; <i>ura3Δ0</i> ; <i>leu2Δ0</i> ; <i>his3Δ1</i> ; <i>met15Δ0</i> ; <i>ADH1prom-NLS-PA-mCh::HIS3</i> ; <i>GPDprom-mga2ΔTM-5xGS-VC::URA3</i> ; <i>ino4Δ::natNT2</i> | This paper | N/A        |
| <i>S. cerevisiae</i> strain Pct1-mCh, genotype: <i>MATa</i> ; <i>ura3Δ0</i> ; <i>leu2Δ0</i> ; <i>his3Δ1</i> ; <i>met15Δ0</i> ; <i>PCT1-mCh::natNT2</i>                                                                                               | This paper | N/A        |
| <i>S. cerevisiae</i> strain <i>mga2Δ</i> Pct1-mCherry Mga2ΔTM, genotype: <i>MATa</i> ; <i>ura3Δ0</i> ; <i>leu2Δ0</i> ; <i>his3Δ1</i> ; <i>met15Δ0</i> ; <i>mga2Δ::kanMX4</i> ; <i>Pct1-mCherry::natNT2</i> ; <i>GPDprom-mga2ΔTM-5xGS-VC::URA3</i>    | This paper | N/A        |
| <i>S. cerevisiae</i> strain <i>opi3Δ</i> Pct1-mCherry, genotype: <i>MATa</i> ; <i>ura3Δ0</i> ; <i>leu2Δ0</i> ; <i>his3Δ1</i> ; <i>met15Δ0</i> ; <i>opi3Δ::kanMX4</i> ; <i>Pct1-mCherry::natNT2</i>                                                   | This paper | N/A        |
| <i>S. cerevisiae</i> strain <i>cho2Δ</i> Pct1-mCherry, genotype: <i>MATa</i> ; <i>ura3Δ0</i> ; <i>leu2Δ0</i> ; <i>his3Δ1</i> ; <i>met15Δ0</i> ; <i>cho2Δ::kanMX4</i> ; <i>Pct1-mCherry::natNT2</i>                                                   | This paper | N/A        |

|                                                                                                                                                                                              |                           |        |
|----------------------------------------------------------------------------------------------------------------------------------------------------------------------------------------------|---------------------------|--------|
| <i>S. cerevisiae</i> strain Ole1-BFP NLS-PA-mCh, genotype: <i>MATa; ura3Δ0; leu2Δ0; his3Δ1; met15Δ0; ADH1prom-NLS-PA-mCh::HIS3; GPDprom-OLE1-BFP::URA3</i>                                   | This paper                | N/A    |
| <i>S. cerevisiae</i> strain <i>mga2Δ</i> Ole1-BFP, genotype: <i>MATa; ura3Δ0; leu2Δ0; his3Δ1; met15Δ0; mga2Δ::kanMX4; GPDprom-OLE1-BFP::URA3</i>                                             | This paper                | N/A    |
| <i>S. cerevisiae</i> strain Opi3-GFP, genotype: <i>MATa; ura3Δ0; leu2Δ0; his3Δ1; met15Δ0; OPI3-GFP::natNT2</i>                                                                               | This paper                | N/A    |
| <i>S. cerevisiae</i> strain <i>ino4Δ</i> Opi3-GFP, genotype: <i>MATa; ura3Δ0; leu2Δ0; his3Δ1; met15Δ0; ino4Δ::kanMX4; OPI3-GFP::natNT2</i>                                                   | This paper                | N/A    |
| <i>S. cerevisiae</i> strain <i>mga2Δ</i> Opi3-GFP Mga2ΔTM, genotype: <i>MATa; ura3Δ0; leu2Δ0; his3Δ1; met15Δ0; mga2Δ::kanMX4; OPI3-GFP::natNT2; GPDprom-mga2ΔTM-5xGS-VC::URA3</i>            | This paper                | N/A    |
| <i>S. cerevisiae</i> strain 4Δ, genotype: BY4742 <i>MATα; ura3Δ0; leu2Δ0; his3Δ1; lys2Δ0; are1Δ::kanMX4; are2Δ::kanMX4; dga1Δ::kanMX4; lro1Δ::kanMX4</i>                                     | (Petschnigg et al., 2009) | N/A    |
| <i>S. cerevisiae</i> strain Ole1-mCh, genotype: <i>MATa; ura3Δ0; leu2Δ0; his3Δ1; met15Δ0; OLE1-mCh::natNT2</i>                                                                               | This paper                | N/A    |
| <i>S. cerevisiae</i> strain <i>mga2Δ</i> Ole1-mCh, genotype: <i>MATa; ura3Δ0; leu2Δ0; his3Δ1; met15Δ0; mga2Δ::kanMX4; OLE1-mCh::natNT2</i>                                                   | This paper                | N/A    |
| <i>S. cerevisiae</i> strain <i>mga2Δ</i> Ole1-mCh Mga2ΔTM, genotype: <i>MATa; ura3Δ0; leu2Δ0; his3Δ1; met15Δ0; mga2Δ::kanMX4; OLE1-mCh::natNT2; GPDprom-mga2ΔTM-5xGS-VC::URA3</i>            | This paper                | N/A    |
| <i>S. cerevisiae</i> strain <i>sei1Δ</i> , genotype: <i>MATa; ura3Δ0; leu2Δ0; his3Δ1; met15Δ0; sei1Δ::kanMX4</i>                                                                             | Euroscarf                 | Y05313 |
| <i>S. cerevisiae</i> strain <i>sei1Δ</i> NLS-PA-mCh, genotype: <i>MATa; ura3Δ0; leu2Δ0; his3Δ1; met15Δ0; sei1Δ::kanMX4; ADH1prom-NLS-PA-mCh::HIS3</i>                                        | This paper                | N/A    |
| <i>S. cerevisiae</i> strain <i>sei1Δ opi3Δ</i> NLS-PA-mCh, genotype: <i>MATa; ura3Δ0; leu2Δ0; his3Δ1; met15Δ0; sei1Δ::kanMX6; opi3Δ::natNT2; ADH1prom-NLS-PA-mCh::HIS3</i>                   | This paper                | N/A    |
| <i>S. cerevisiae</i> strain <i>sei1Δ</i> NLS-PA-mCh Ole1-BFP, genotype: <i>MATa; ura3Δ0; leu2Δ0; his3Δ1; met15Δ0; sei1Δ::kanMX4; ADH1prom-NLS-PA-mCh::HIS3; GPDprom-OLE1-BFP::URA3</i>       | This paper                | N/A    |
| <i>S. cerevisiae</i> strain <i>sei1Δ</i> NLS-PA-mCh Mga2ΔTM, genotype: <i>MATa; ura3Δ0; leu2Δ0; his3Δ1; met15Δ0; sei1Δ::kanMX4; ADH1prom-NLS-PA-mCh::HIS3; GPDprom-mga2ΔTM-5xGS-VC::URA3</i> | This paper                | N/A    |
| <i>S. cerevisiae</i> strain <i>sei1Δ mga2Δ</i> , genotype: <i>MATa; ura3Δ0; leu2Δ0; his3Δ1; met15Δ0; mga2Δ::kanMX4; sei1Δ::natNT2</i>                                                        | This paper                | N/A    |
| <i>S. cerevisiae</i> strain <i>sei1Δ mga2Δ</i> Ole1-BFP, genotype: <i>MATa; ura3Δ0; leu2Δ0; his3Δ1; met15Δ0; mga2Δ::kanMX4; sei1Δ::natNT2; GPDprom-OLE1-BFP::URA3</i>                        | This paper                | N/A    |

**Table S2. Plasmids used in this study, related to the Key Resources Table and STAR Methods.**

| PLASMIDS                                                                                                | SOURCE                        | IDENTIFIER |
|---------------------------------------------------------------------------------------------------------|-------------------------------|------------|
| Yeast plasmids based on the pRS31X series                                                               | (Sikorski and Hieter, 1989)   | N/A        |
| Plasmid: <i>MGA2prom-Mga2-mCh: pRS313-MGA2prom-MGA2-mCh</i>                                             | This paper                    | N/A        |
| Plasmid: <i>MGA2prom-Mga2ΔTM-mCh: pRS313-MGA2prom-MGA2(1-1037)-mCh</i>                                  | This paper                    | N/A        |
| Plasmid: <i>GPDprom-Mga2-mCh: pRS316-GPDprom-MGA2-mCh</i>                                               | This paper                    | N/A        |
| Plasmid: <i>GPDprom-Mga2ΔTM-mCh: pRS316-GPDprom-MGA2(1-1037)-mCh</i>                                    | This paper                    | N/A        |
| Plasmid: <i>GAL1prom-Mga2ΔTM-mCh: pRS316-GAL1prom-MGA2(1-1037)-mCh</i>                                  | This paper                    | N/A        |
| Plasmid: <i>GPDprom-Mga2ΔTM-5xGS-VC: pRS306-GPDprom-MGA2(1-1037)-5xGS-VC</i>                            | This paper                    | N/A        |
| Plasmid: <i>GPDprom-Mga2ΔTM-5xGS-VC: pRS316-GPDprom-MGA2(1-1037)-5xGS-VC</i>                            | This paper                    | N/A        |
| Plasmid: <i>GPDprom-Mga2ΔTM-mCh: pRS306-GPDprom-MGA2(1-1037)-mCherry</i>                                | This paper                    | N/A        |
| Plasmid: <i>ER LipSat sensor: pRS313-ADH1prom-mGFP-MGA2(128-1113)</i>                                   | This paper                    | N/A        |
| Plasmid: <i>ER LipSat sensor: pRS315-ADH1prom-mGFP-MGA2(128-1113)</i>                                   | This paper                    | N/A        |
| Plasmid: <i>ER LipSat sensor-mCh: pRS313-ADH1prom-mGFP-MGA2(128-1113)-mCherry</i>                       | This paper                    | N/A        |
| Plasmid: <i>INM LipSat sensor: pRS313-ADH1prom-mGFP-HEH2(93-317)-MGA2(128-1113)</i>                     | This paper                    | N/A        |
| Plasmid: <i>INM W1042A LipSat sensor mutant: pRS313-ADH1prom-mGFP-HEH2(93-317)-MGA2(128-1113)W1042A</i> | This paper                    | N/A        |
| Plasmid: <i>INM P1044L LipSat sensor mutant: pRS313-ADH1prom-mGFP-HEH2(93-317)-MGA2(128-1113)P1044L</i> | This paper                    | N/A        |
| Plasmid: <i>INM LipSat sensor-mCh: pRS313-ADH1prom-mGFP-HEH2(93-317)-MGA2(128-1113)-mCherry</i>         | This paper                    | N/A        |
| Plasmid: <i>mCh-INM LipSat sensor: pRS313-ADH1prom-mCherry-HEH2(93-317)-MGA2(128-1113)</i>              | This paper                    | N/A        |
| Plasmid: <i>mGFP-Mga2: pRS313-ADH1prom-mGFP-MGA2</i>                                                    | This paper                    | N/A        |
| Plasmid: <i>MGA2prom-mGFP-Mga2: pRS313-MGA2prom-mGFP-MGA2</i>                                           | This paper                    | N/A        |
| Plasmid: <i>GPDprom-Ole1-mCh: pRS316-GPDprom-OLE1-mCh</i>                                               | This paper                    | N/A        |
| Plasmid: <i>GAL1prom-Ole1-mCh: pRS316-GAL1prom-OLE1-mCh</i>                                             | This paper                    | N/A        |
| Plasmid: <i>OLE1prom-Ole1-mCh: pRS316-OLE1prom-OLE1-mCh</i>                                             | This paper                    | N/A        |
| Plasmid: <i>GPDprom-Ole1-BFP: pRS316-GPDprom-OLE1-BFP</i>                                               | This paper                    | N/A        |
| Plasmid: <i>GPDprom-Ole1-BFP: pRS306-GPDprom-OLE1-BFP</i>                                               | This paper                    | N/A        |
| Plasmid: <i>NLS-PA-mCh: pRS303-ADH1prom-NUP60(1-24)-OPI1(103-191)-mCh</i>                               | This paper                    | N/A        |
| Plasmid: <i>NLS-PA-mCh: pRS316-CYC1prom-NUP60(1-24)-OPI1(103-191)-mCh</i>                               | (Romanauska and Kohler, 2018) | N/A        |

|                                                                                                 |                               |     |
|-------------------------------------------------------------------------------------------------|-------------------------------|-----|
| Plasmid: <i>GPDprom-Spt23-mCh: pRS316-GPDprom-SPT23-mCh</i>                                     | This paper                    | N/A |
| Plasmid: PA-mCh: <i>pRS316-CYC1prom-OPI1(103-191)-mCh</i>                                       | (Romanauska and Kohler, 2018) | N/A |
| Plasmid: <i>INO4prom-INO4: pRS315-INO4prom-INO4</i>                                             | This paper                    | N/A |
| Plasmid: <i>GPDprom-Faa4-mCh: pRS316-GPDprom-FAA4-mCh</i>                                       | This paper                    | N/A |
| Plasmid: <i>GPDprom-Elo1-mCh: pRS316-GPDprom-ELO1-mCh</i>                                       | This paper                    | N/A |
| Plasmid: <i>GPDprom-Mvd1-mCh: pRS316-GPDprom-MVD1-mCh</i>                                       | This paper                    | N/A |
| Plasmid: Sei1: <i>pRS315-SEI1prom-mGFP-SEI1</i>                                                 | This paper                    | N/A |
| Plasmid: Heh2-Sei1: <i>pRS315-SEI1prom-mGFP-HEH2(93-317)-SEI1</i>                               | This paper                    | N/A |
| Plasmid: Heh2-Sei1: <i>pRS313-SEI1prom-mGFP-HEH2(93-317)-SEI1</i>                               | This paper                    | N/A |
| Plasmid: Heh2 $\Delta$ NLS-Sei1: <i>pRS315-SEI1prom-mGFP-HEH2(138-317)-SEI1</i>                 | This paper                    | N/A |
| Plasmid: Sec62-mNeonGreen: <i>pRS316-SEC62prom-SEC62-5xGS-mNeonGreen</i>                        | This paper                    | N/A |
| Plasmid: Pet10-mGFP: <i>pRS313-PET10prom-PET10-mGFP</i>                                         | This paper                    | N/A |
| Plasmid: mGFP-Dga1: <i>pRS313-ADH1prom-mGFP-DGA1</i>                                            | This paper                    | N/A |
| Plasmid: PA 6A-mCh: <i>pRS316-CYC1prom-opi1(103-191)K112A R115A K119A K121A K125A K128A-mCh</i> | This paper                    | N/A |
| Plasmid: PA 6D-mCh: <i>pRS316-CYC1prom-opi1(103-191)K112D R115D K119D K121D K125D K128D-mCh</i> | This paper                    | N/A |
